# Supplementary material
Source: PubMed Central journal article supplement (PMC5005433)
Supplement: mmc1.pdf [file mmc1.pdf]

## Supplemental Data

### Large-Scale Exome-wide Association Analysis

#### Identifies Loci for White Blood Cell Traits

#### and Pleiotropy with Immune-Mediated Diseases

Salman M. Tajuddin, Ursula M. Schick, John D. Eicher, Nathalie Chami, Ayush Giri, Jennifer A. Brody, W. David Hill, Tim Kacprowski, Jin Li, Leo-Pekka Lyytikäinen, Ani Manichaikul, Evelin Mihailov, Michelle L. O'Donoghue, Nathan Pankratz, Raha Pazoki, Linda M. Polfus, Albert Vernon Smith, Claudia Schurmann, Caterina Vacchi-Suzzi, Dawn M. Waterworth, Evangelos Evangelou, Lisa R. Yanek, Amber Burt, Ming-Huei Chen, Frank J.A. van Rooij, James S. Floyd, Andreas Greinacher, Tamara B. Harris, Heather M. Highland, Leslie A. Lange, Yongmei Liu, Reedik Mägi, Mike A. Nalls, Rasika A. Mathias, Deborah A. Nickerson, Kjell Nikus, John M. Starr, Jean-Claude Tardif, Ioanna Tzoulaki, Digna R. Velez Edwards, Lars Wallentin, Traci M. Bartz, Lewis C. Becker, Joshua C. Denny, Laura M. Raffield, John D. Rioux, Nele Friedrich, Myriam Fornage, He Gao, Joel N. Hirschhorn, David C.M. Liewald, Stephen S. Rich, Andre Uitterlinden, Lisa Bastarache, Diane M. Becker, Eric Boerwinkle, Simon de Denus, Erwin P. Bottinger, Caroline Hayward, Albert Hofman, Georg Homuth, Ethan Lange, Lenore J. Launer, Terho Lehtimäki, Yingchang Lu, Andres Metspalu, Chris J. O'Donnell, Rakale C. Quarells, Melissa Richard, Eric S. Torstenson, Kent D. Taylor, Anne-Claire Vergnaud, Alan B. Zonderman, David R. Crosslin, Ian J. Deary, Marcus Dörr, Paul Elliott, Michele K. Evans, Vilmundur Gudnason, Mika Kähönen, Bruce M. Psaty, Jerome I. Rotter, Andrew J. Slater, Abbas Dehghan, Harvey D. White, Santhi K. Ganesh, Ruth J.F. Loos, Tõnu Esko, Nauder Faraday, James G. Wilson, Mary Cushman, Andrew D. Johnson, Todd L. Edwards, Neil A. Zakai, Guillaume Lettre, Alex P. Reiner, and Paul L. Auer

## Supplemental Figure

**Figure S1. Quantile-quantile plots of p-values of white blood cell traits.** Results of the three sets of discovery meta-analyses in combined all ancestries (ALL), European ancestry (EA), and African ancestry (AA) individuals are shown here. The combined all ancestry samples include Hispanic Americans, East Asians, and South Asians in addition to EAs and AAs.

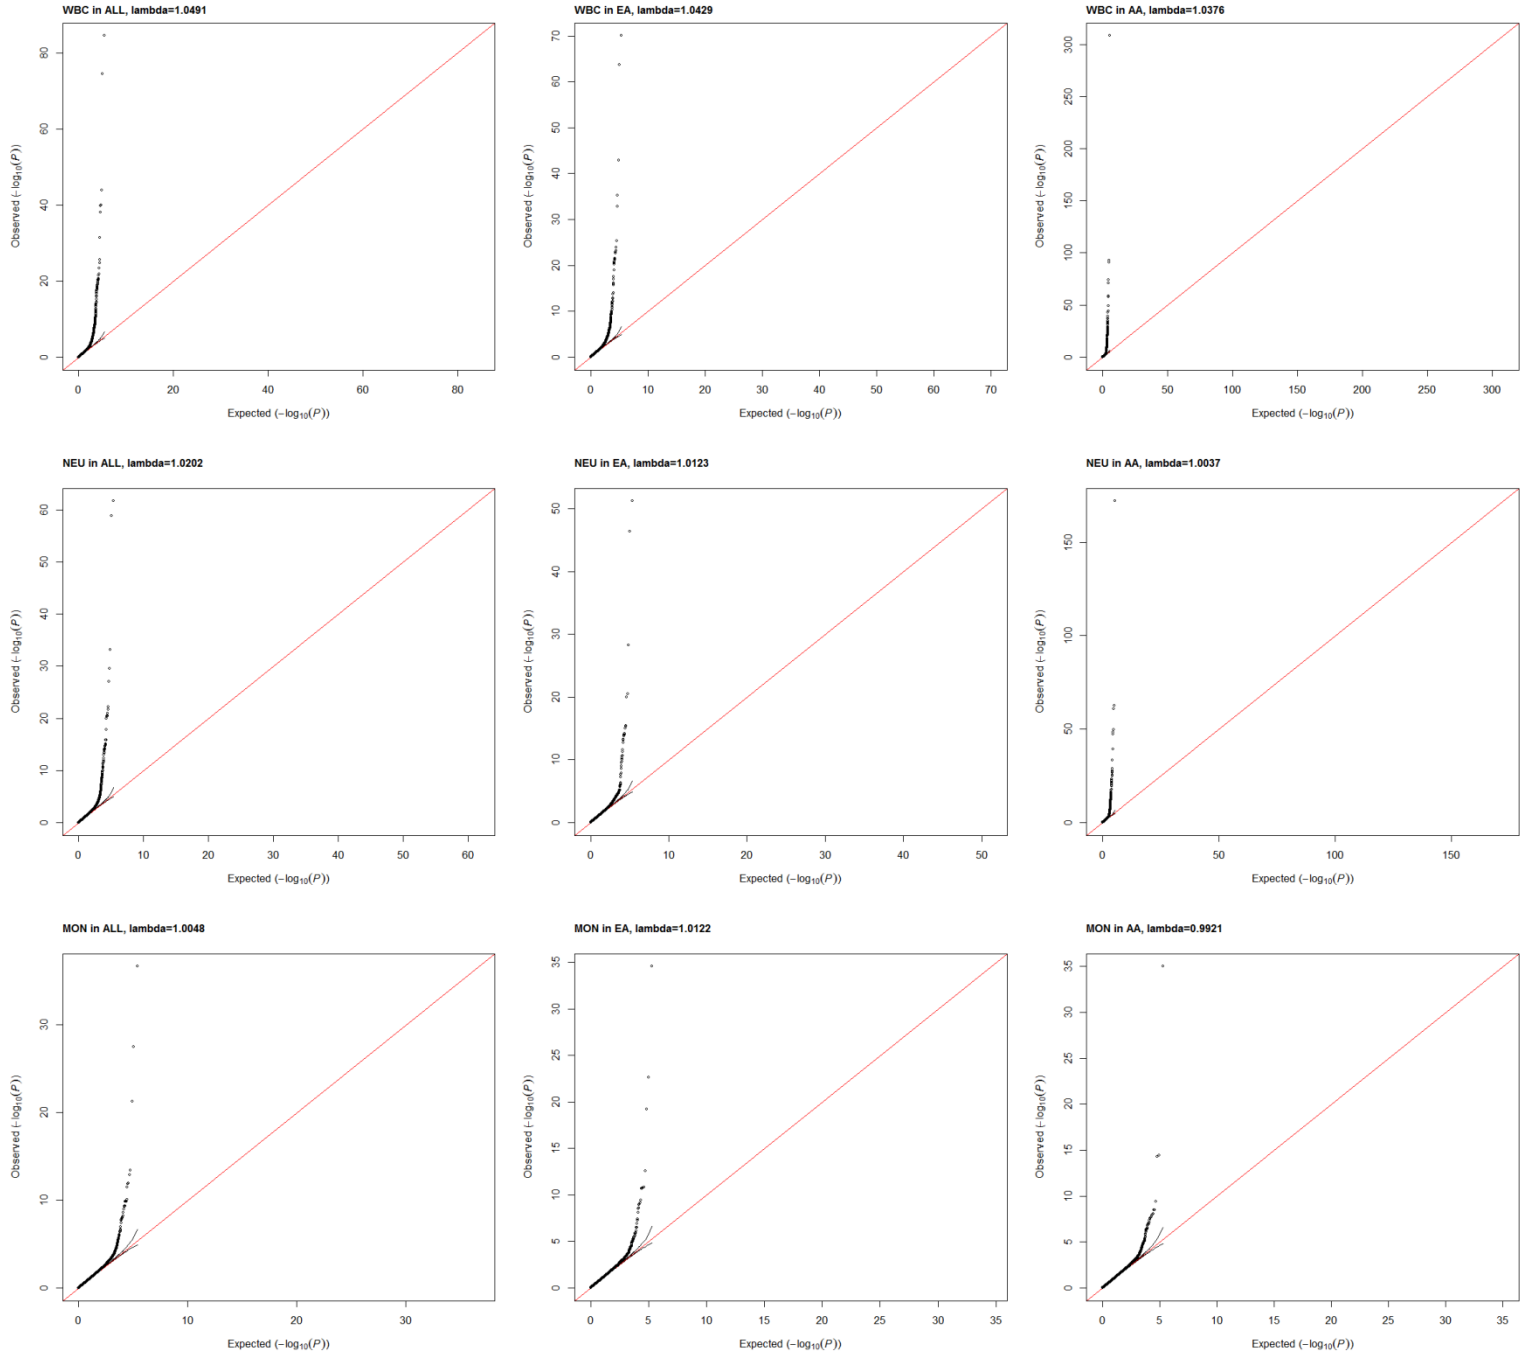

**Figure S1. Continued**

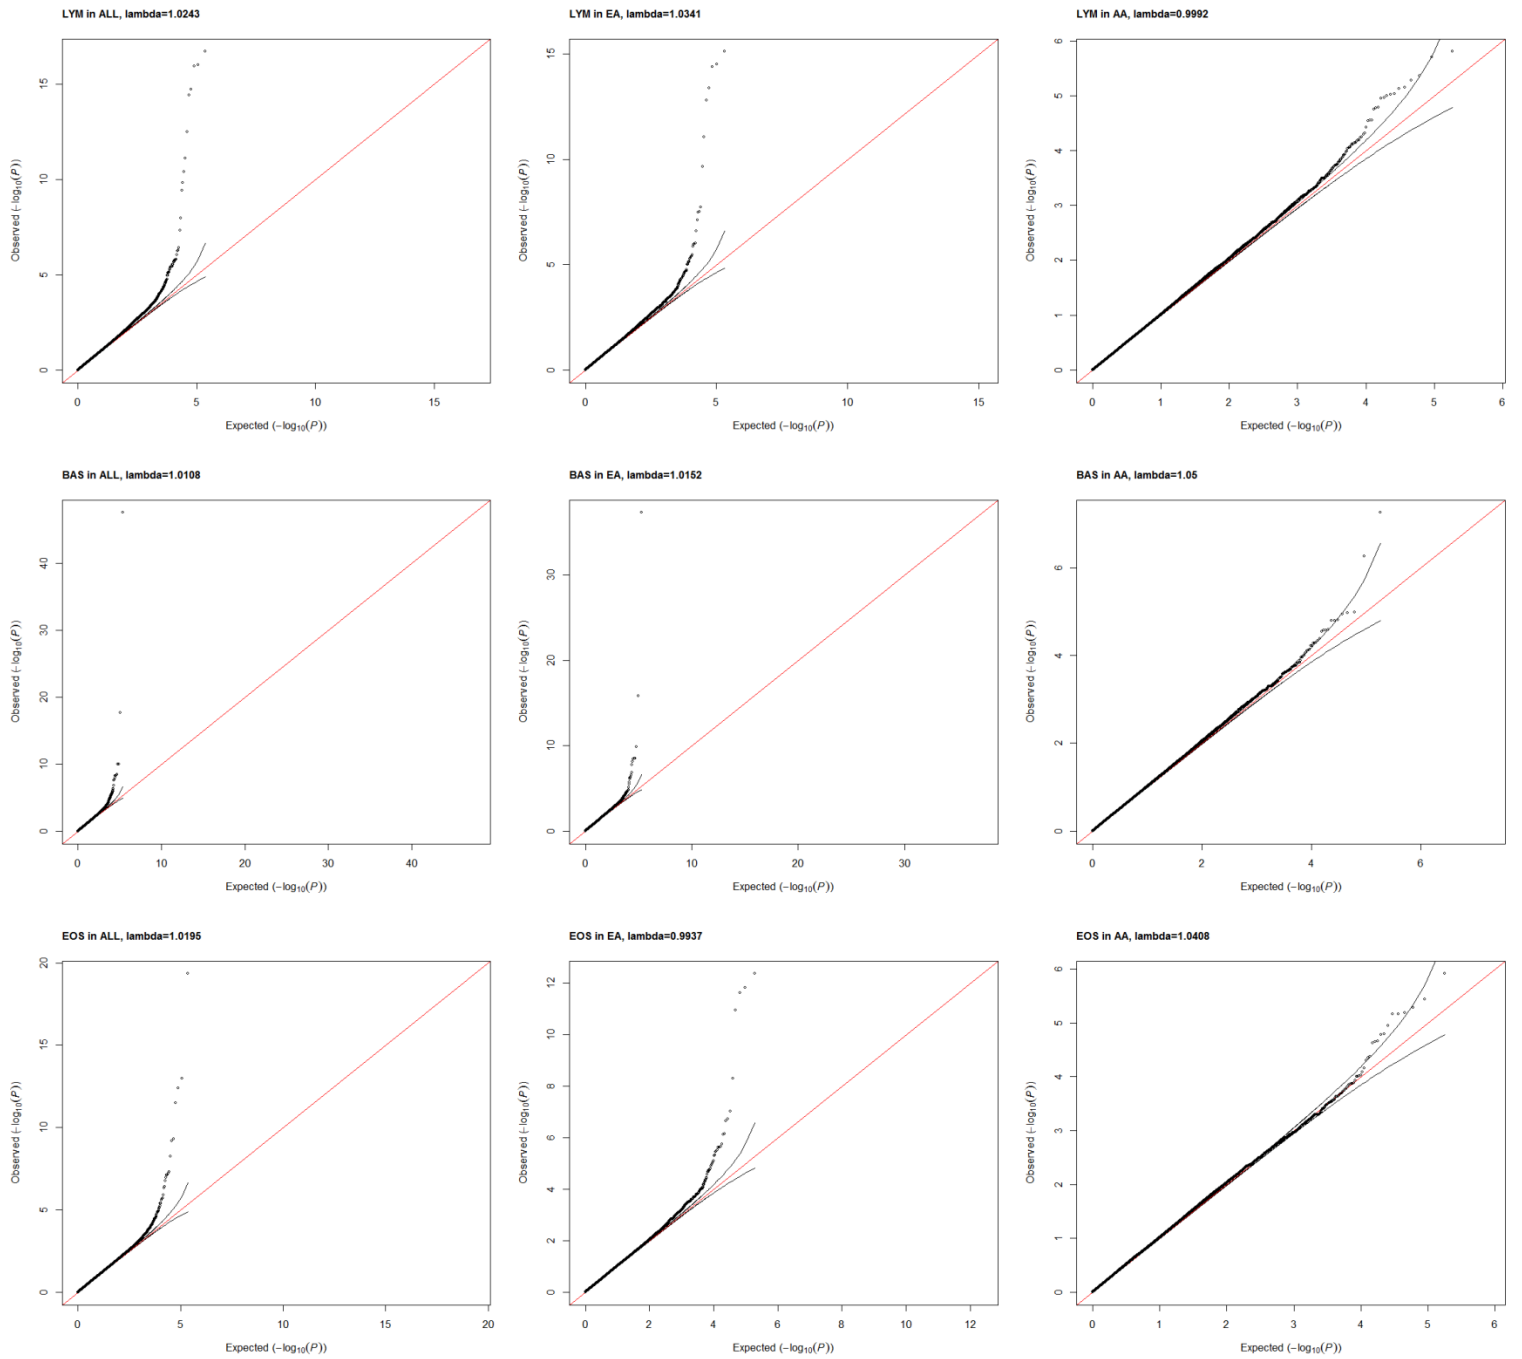

**Figure S2. Manhattan plots of discovery p-values of white blood cell traits in African Americans**

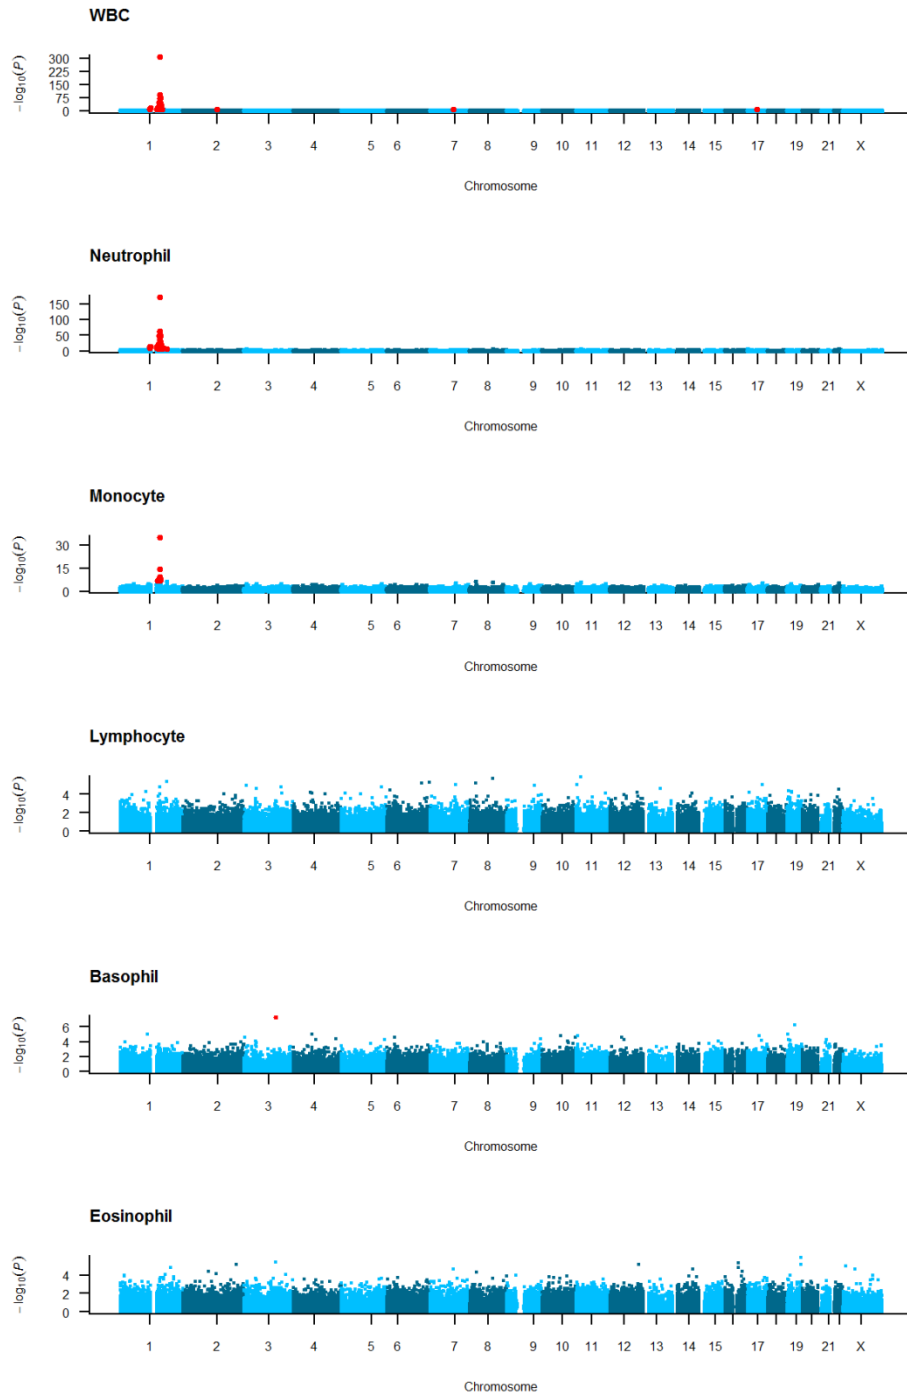

## Supplemental Tables

See Table S1 and Table S2 in the accompanying Excel file.

Table S3. Sample size across ethnicities for white blood cell exome-wide association analysis

| Study                     | Total WBC     |        |       |     |     | Neutrophil     |        |       |     |     | Monocyte      |       |       | Lymphocyte    |       |       | Basophil      |       |       | Eosinophil    |       |       |               |       |       |
|---------------------------|---------------|--------|-------|-----|-----|----------------|--------|-------|-----|-----|---------------|-------|-------|---------------|-------|-------|---------------|-------|-------|---------------|-------|-------|---------------|-------|-------|
|                           | Ethnicity     |        |       |     |     | Ethnicity      |        |       |     |     | Ethnicity     |       |       | Ethnicity     |       |       | Ethnicity     |       |       |               |       |       |               |       |       |
|                           | EA            | AA     | HA    | EAS | SA  | EA             | AA     | HA    | EAS | SA  | EA            | AA    | HA    | EA            | AA    | HA    | EA            | AA    | HA/HL | EA            | AA    | HA    |               |       |       |
| <b>Discovery</b>          |               |        |       |     |     |                |        |       |     |     |               |       |       |               |       |       |               |       |       |               |       |       |               |       |       |
| AGES                      | 2,955         |        |       |     |     | 2,954          |        |       |     |     | 2,954         | 368   |       | 2,954         |       |       |               |       |       |               | 2,954 |       |               |       |       |
| ARIC                      | 10,345        | 2,821  |       |     |     | 6,792          | 368    |       |     |     | 6,792         | 368   |       | 6,792         | 368   |       | 6,792         | 368   |       | 6,792         | 368   |       | 6,792         | 368   |       |
| BIOME                     | 1,043         | 2,328  | 3,319 |     |     | 636            | 1,981  | 2,688 |     |     | 10,209        | 1,981 | 2,688 | 636           | 1,981 | 2,688 | 636           | 1,981 | 2,688 | 636           | 1,981 | 2,688 | 636           | 1,981 | 2,688 |
| BIOVU - I                 | 21,276        | 1,921  |       |     |     | 10,208         | 909    |       |     |     | 636           | 910   |       | 10,218        | 911   |       | 14,903        | 1,357 |       | 14,903        | 1,357 |       | 14,903        | 1,357 |       |
| BIOVU - II                |               | 1,020  |       |     |     |                | 385    |       |     |     |               | 384   |       |               | 385   |       |               |       |       |               | 393   |       |               |       |       |
| CARDIA                    | 2,110         | 1,946  |       |     |     | 2,110          | 1,942  |       |     |     | 2,095         | 1,928 |       | 2,110         | 1,942 |       | 1,637         | 1,350 |       | 1,637         | 1,350 |       | 1,955         | 1,762 |       |
| CHS                       | 4,197         | 776    |       |     |     |                |        |       |     |     |               |       |       |               |       |       |               |       |       |               |       |       |               |       |       |
| ECGUT                     | 974           |        |       |     |     | 973            |        |       |     |     | 973           |       |       | 973           |       |       | 962           |       |       | 962           |       |       | 968           |       |       |
| FHS                       | 5,610         |        |       |     |     | 2,314          |        |       |     |     | 2,314         |       |       | 2,314         |       |       | 2,314         |       |       | 2,314         |       |       | 2,314         |       |       |
| SOLID TIMI-52             | 8,025         | 198    | 874   | 254 | 116 | 8,026          | 198    | 874   | 251 | 116 |               |       |       |               |       |       |               |       |       |               |       |       |               |       |       |
| STABILITY                 | 8,490         | 118    | 500   | 714 | 348 | 8,487          | 118    | 500   | 714 | 347 |               |       |       |               |       |       |               |       |       |               |       |       |               |       |       |
| HABC                      | 1,251         |        |       |     |     | 1,251          |        |       |     |     | 1,251         |       |       | 1,251         |       |       | 1,251         |       |       | 1,251         |       |       | 1,251         |       |       |
| HANDLS                    |               | 834    |       |     |     |                | 834    |       |     |     |               | 834   |       |               | 834   |       |               | 813   |       |               | 813   |       |               | 832   |       |
| JHS                       |               | 2,039  |       |     |     |                | 2,027  |       |     |     |               | 2,026 |       |               | 2,028 |       |               | 1,898 |       |               | 1,898 |       |               | 1,989 |       |
| LBC1921                   | 475           |        |       |     |     | 473            |        |       |     |     | 473           |       |       | 473           |       |       |               |       |       |               |       |       |               |       |       |
| LBC1936                   | 963           |        |       |     |     | 963            |        |       |     |     | 963           |       |       | 963           |       |       |               |       |       |               |       |       |               |       |       |
| MESA                      | 1,266         | 750    | 843   |     |     | 1,122          | 673    | 763   |     |     | 1,123         | 675   | 764   | 1,121         | 675   | 762   | 1,123         | 673   | 765   | 1,123         | 673   | 765   | 1,121         | 671   | 762   |
| MHIBB                     | 7,911         |        |       |     |     | 6,978          |        |       |     |     | 6,978         |       |       | 6,978         |       |       | 6,978         |       |       | 6,978         |       |       | 6,978         |       |       |
| REGARDS                   |               | 5,030  |       |     |     |                |        |       |     |     |               |       |       |               |       |       |               |       |       |               |       |       |               |       |       |
| RS                        | 2,794         |        |       |     |     |                |        |       |     |     |               |       |       | 2,758         |       |       |               |       |       |               |       |       |               |       |       |
| SHIP                      | 7,251         |        |       |     |     | 4,076          |        |       |     |     | 4,076         |       |       | 4,076         |       |       | 4,075         |       |       | 4,075         |       |       | 4,077         |       |       |
| WHI                       | 21,660        | 3,469  |       |     |     | 3,488          | 684    |       |     |     | 3,488         | 684   |       | 3,488         | 684   |       | 3,467         | 676   |       | 3,467         | 676   |       | 3,471         | 679   |       |
| Total per ancestry        | 108,596       | 23,250 | 5,536 | 968 | 464 | 60,851         | 10,119 | 4,825 | 965 | 463 | 44,325        | 9,790 | 3,452 | 47,105        | 9,808 | 3,450 | 44,138        | 9,509 | 3,453 | 44,138        | 9,509 | 3,453 | 32,517        | 8,282 | 3,450 |
| <b>Total per trait</b>    |               |        |       |     |     | <b>138,814</b> |        |       |     |     |               |       |       | <b>57,567</b> |       |       | <b>60,363</b> |       |       | <b>57,100</b> |       |       | <b>44,249</b> |       |       |
| <b>Replication</b>        |               |        |       |     |     |                |        |       |     |     |               |       |       |               |       |       |               |       |       |               |       |       |               |       |       |
| AIRWAVE                   | 14,887        |        |       |     |     | 14,887         |        |       |     |     | 14,887        |       |       | 14,887        |       |       | 14,887        |       |       | 14,887        |       |       | 14,887        |       |       |
| BIOVU-Replication (EA)    | 1,987         |        |       |     |     | 888            |        |       |     |     | 888           |       |       | 888           |       |       | 905           |       |       | 905           |       |       |               |       |       |
| FINCAVAS                  | 911           |        |       |     |     | 397            |        |       |     |     | 397           |       |       | 397           |       |       | 397           |       |       | 397           |       |       | 440           |       |       |
| GeneSTAR                  | 1,023         |        |       |     |     | 894            |        |       |     |     | 894           |       |       | 937           |       |       |               |       |       |               |       |       |               |       |       |
| <b>Total per ancestry</b> | <b>18,808</b> |        |       |     |     | <b>17,066</b>  |        |       |     |     | <b>17,066</b> |       |       | <b>17,109</b> |       |       | <b>16,189</b> |       |       | <b>16,189</b> |       |       | <b>15,327</b> |       |       |
| Total per trait           |               |        |       |     |     | 18,808         |        |       |     |     | 17,066        |       |       | 17,066        |       |       | 17,109        |       |       | 16,189        |       |       | 15,327        |       |       |
| <b>Grand Total</b>        |               |        |       |     |     | <b>157,622</b> |        |       |     |     | <b>94,289</b> |       |       | <b>74,633</b> |       |       | <b>77,472</b> |       |       | <b>73,289</b> |       |       | <b>59,576</b> |       |       |

Abbreviations: EA, European Ancestry; AA, African Ancestry; HA, Hispanic American; EAS, East Asian; SA, South Asian.

Table S4. Mean and standard deviations of white blood cell traits in participating cohorts of the Blood-Cell Consortium

| Study       | Age           | % Female | Total WBC      | Neutrophil       | Monocyte       | Lymphocyte     | Basophil        | Eosinophil      |
|-------------|---------------|----------|----------------|------------------|----------------|----------------|-----------------|-----------------|
| AIRWAVE     | 40.87 (9.03)  | 37.3     | 6.52 (1.71)    | 3.94 (1.34)      | 0.4 (0.18)     | 1.8 (0.53)     | 0.06 (0.04)     | 0.2 (0.12)      |
| n           | 14887         | 5550     | 14887          | 14886            | 14887          | 14886          | 14865           | 14866           |
| AGES        | 76.4 (5.5)    | 57.9     | 6.05 (1.81)    | 3.55 (1.30)      | 0.541 (0.0178) | 1.74 (0.972)   | 0.0286 (0.0256) | 0.207 (0.145)   |
| n           | 2953          | 1711     | 2955           | 2954             | 2954           | 2954           | 2954            | 2954            |
| ARIC-AA     | 56.5 (5.8)    | 62.8     | 5.6 (1.9)      | 3.1 (1.4)        | 0.3 (0.1)      | 2.0 (0.6)      | 0.1 (0.0)       | 0.1 (0.1)       |
| n           | 2832          | 1779     | 2832           | 369              | 369            | 369            | 160             | 355             |
| ARIC-EA     | 57.3 (5.7)    | 53       | 6.2 (2.0)      | 3.8 (1.4)        | 0.4 (0.2)      | 1.8 (0.7)      | 0.1 (0.0)       | 0.2 (0.1)       |
| n           | 10347         | 5489     | 10346          | 6792             | 6792           | 6792           | 2351            | 3893            |
| BioME-AA    | 57 (14)       | 38.6     | 6.6 (2.2)      | 3.8 (1.8)        | 0.5 (0.2)      | 2.0 (0.8)      | 0.0 (0.0)       | 0.2 (0.1)       |
| n           | 2653          | 1024     | 2329           | 1966             | 1966           | 1966           | 1966            | 1966            |
| BioME-EA    | 68 (11)       | 38.9     | 7.2 (2.9)      | 4.7 (2.4)        | 0.6 (0.2)      | 1.7 (1.6)      | 0.0 (0.0)       | 0.2 (0.1)       |
| n           | 1090          | 424      | 1046           | 634              | 634            | 634            | 634             | 634             |
| BioME-HA    | 61 (15)       | 62       | 7.4 (2.3)      | 4.6 (1.9)        | 0.6 (0.2)      | 2.0 (0.8)      | 0.0 (0.0)       | 0.2 (0.2)       |
| n           | 3640          | 2258     | 3319           | 2660             | 2660           | 2660           | 2660            | 2660            |
| BioVU-I-EA  | 56.42 (16.82) | 54.8     | 7.87 (5.34)    | 5.03 (3.16)      | 0.64 (0.54)    | 1.88 (2.76)    | 0.0456 (0.0433) | NA              |
| N           | 21276         | 11654    | 21276          | 10208            | 10209          | 10218          | 14903           | NA              |
| BioVU-I-AA  | 49.58 (18.37) | 61.1     | 7.30 (3.45)    | 4.56 (0.04)      | 0.59 (0.32)    | 2.06 (3.44)    | 0.0337 (0.0341) | NA              |
| n           | 1921          | 1174     | 1921           | 909              | 910            | 911            | 1357            | NA              |
| BioVU-II-EA | 50.93 (15.22) | 100      | 7.75 (2.58)    | 4.93 (2.58)      | 0.58 (0.27)    | 1.9 (0.81)     | 0.036 (0.026)   | NA              |
| n           | 2298          | 2298     | 1987           | 888              | 888            | 888            | 928             | NA              |
| BioVU-II-AA | 39.40 (13.60) | 100      | 7.63 (3.17)    | 4.58 (3.14)      | 0.56 (0.33)    | 2.53 (5.91)    | 0.0346 (0.0497) | NA              |
| n           | 1375          | 1375     | 1020           | 385              | 384            | 385            | 393             | NA              |
| CARDIA-EA   | 25.41 (3.36)  | 52.7     | 6.25 (1.78)    | 3.50 (1.40)      | 0.32 (0.18)    | 2.13 (0.65)    | 0.04 (0.05)     | 0.17 (0.14)     |
| n           | 2110          | 1113     | 2110           | 2110             | 2095           | 2110           | 1637            | 1955            |
| CARDIA-AA   | 24.23 (3.77)  | 56.3     | 5.90 (1.95)    | 3.12 (1.49)      | 0.31 (0.17)    | 2.24 (0.83)    | 0.05 (0.04)     | 0.16 (0.13)     |
| n           | 1946          | 1095     | 1946           | 1942             | 1928           | 1942           | 1348            | 1760            |
| CHS-EA      | 72.8 (5.6)    | 56.3     | 6.4 (2.0)      | NA               | NA             | NA             | NA              | NA              |
| n           | 4197          | 2361     | 4197           | NA               | NA             | NA             | NA              | NA              |
| CHS-AA      | 72.8 (5.6)    | 62.2     | 5.9 (1.9)      | NA               | NA             | NA             | NA              | NA              |
| n           | 776           | 483      | 776            | NA               | NA             | NA             | NA              | NA              |
| EGCUT       | 47.08 (16.72) | 46.9     | 6.36 (1.7842)  | 3.70 (1.4080)    | 0.51 (0.1773)  | 1.96 (0.6362)  | 0.0299 (0.0194) | 0.154 (0.1217)  |
| n           | 974           | 457      | 974            | 973              | 973            | 973            | 974             | 973             |
| FHS         | 42.6 (13.9)   | 53.1     | 6.1 (1.6)      | 3.6 (1.2)        | 0.5 (0.1)      | 1.7 (0.5)      | 0.0 (0.0)       | 0.2 (0.1)       |
| n           | 5790          | 3077     | 5610           | 2315             | 2315           | 2315           | 2315            | 2315            |
| FINCAVAS    | 53.3 (13.9)   | 41.9     | 7.3 (2.5)      | 4.1 (2.2)        | 0.5 (0.2)      | 2.2 (1.1)      | 0.04 (0.03)     | 0.23 (0.2)      |
| n           | 913           | 383      | 912            | 396              | 396            | 396            | 396             | 436             |
| GeneSTAR-EA | 42.47 (12.67) | 52.20    | 6.64 (2.00)    | 4.21 (1.55)      | 0.38 (0.18)    | 2.09 (0.63)    | NA              | NA              |
| n           | 1023          | 534      | 1023           | 894              | 894            | 937            | NA              | NA              |
| GeneSTAR-AA | 42.40 (12.34) | 61.99    | 6.01 (1.87)    | 3.47 (1.47)      | 0.3 (0.16)     | 2.23 (0.7)     | NA              | NA              |
| n           | 613           | 380      | 613            | 543              | 543            | 562            | NA              | NA              |
| HABC-EA     | 75.72 (2.83)  | 52.5     | 6.593 (3.69)   | 3.837 (1.44)     | 0.564 (0.20)   | 1.93 (3.20)    | 0.0636 (0.04)   | 0.19 (0.17)     |
| n           | 1251          | 657      | 1251           | 1251             | 1251           | 1251           | 1251            | 1251            |
| HANDLS      | 48.13 (8.90)  | 54.7     | 6.23 (2.06)    | 3.55 (1.66)      | 0.40 (0.16)    | 2.08 (0.72)    | 0.03 (0.02)     | 0.16 (0.13)     |
| n           | 870           | 476      | 834            | 834              | 834            | 834            | 813             | 832             |
| JHS         | 53.0 (13.0)   | 37.5     | 5.59 (1.87)    | 3.09 (1.48)      | 0.39 (0.14)    | 1.93 (0.66)    | 0.03 (0.02)     | 0.14 (0.13)     |
| n           | 2258          | 846      | 2044           | 2032             | 2030           | 2032           | 1903            | 2000            |
| LBC1936     | 69.6 (0.8)    | 49.6     | 7.0 (1.9)      | 4.4 (1.5)        | 0.5 (0.2)      | 1.8 (0.8)      | NA              | NA              |
| n           | 964           | 478      | 963            | 963              | 963            | 963            | NA              | NA              |
| LBC1921     | 79.1 (0.6)    | 58.3     | 7.1 (1.9)      | 4.6 (1.4)        | 0.5 (0.2)      | 1.7 (1.1)      | NA              | NA              |
| n           | 475           | 277      | 475            | 473              | 473            | 473            | NA              | NA              |
| MESA-EA     | 69.49 (9.55)  | 50.1     | 6.139 (1.706)  | 3.79 (1.299)     | 0.483 (0.1842) | 1.666 (0.5854) | 0.028 (0.0445)  | 0.171 (0.1275)  |
| n           | 1267          | 635      | 1266           | 1193             | 1194           | 1193           | 1179            | 1186            |
| MESA-AA     | 69.54 (9.10)  | 53.9     | 5.779 (1.93)   | 3.205 (1.4436)   | 0.428 (0.166)  | 1.883 (0.6357) | 0.018 (0.0341)  | 0.162 (0.1284)  |
| n           | 750           | 404      | 750            | 669              | 670            | 670            | 653             | 667             |
| MESA-HA     | 68.93 (9.43)  | 52       | 6.185 (1.6204) | 3.68647 (1.3285) | 0.433 (0.1618) | 1.789 (0.5582) | 0.020 (0.0385)  | 0.1721 (0.1322) |
| n           | 845           | 439      | 843            | 623              | 622            | 622            | 609             | 613             |
| MESA-EAS    | 65.12 (10.01) | 47.1     | 5.314 (1.3629) | 3.0834 (1.0671)  | 0.290 (0.108)  | 1.640 (0.5039) | 0.030 (0.0311)  | 0.122 (0.1224)  |
| n           | 119           | 56       | 119            | 94               | 94             | 94             | 82              | 86              |
| MHIBB       | 63.9 (10.9)   | 36.6     | 7.3 (2.5)      | 4.6 (2.2)        | 0.6 (0.2)      | 1.8 (1.0)      | 0.0 (0.1)       | 0.2 (0.1)       |
| n           | 7911          | 2899     | 7911           | 7911             | 7911           | 7911           | 7911            | 7911            |
| REGARDS     | 63.5 (9.2)    | 68.0     | 5.6 (2.0)      | NA               | NA             | NA             | NA              | NA              |
| n           | 5039          | 3427     | 5030           | NA               | NA             | NA             | NA              | NA              |
| RS          | 69.8 (0.7)    | 53.6     | 7(2)           | NA               | NA             | 3 (1)          | NA              | NA              |

|                   |               |       |                |                |             |             |             |             |
|-------------------|---------------|-------|----------------|----------------|-------------|-------------|-------------|-------------|
| n                 | 3016          | 1618  | 2794           | NA             | NA          | 2758        | NA          | NA          |
| SHIP              | 49.19 (16.09) | 51    | 6.74 (2.02)    | NA             | NA          | NA          | NA          | NA          |
| n                 | 3164          | 1613  | 3159           | NA             | NA          | NA          | NA          | NA          |
| SHIP-Trend        | 52.00 (15.40) | 51.3  | 6.15 (1.94)    | 3.64 (1.41)    | 0.53 (0.18) | 1.75 (0.59) | 0.03 (0.02) | 0.16 (0.12) |
| n                 | 4245          | 2179  | 4238           | 4222           | 4222        | 4222        | 4221        | 4223        |
| SOLID-TIMI 52-AA  | 60.50 (10.13) | 33.8  | 6.909 (2.137)  | 4.3402 (1.773) | NA          | NA          | NA          | NA          |
| n                 | 201           | 68    | 200            | 200            | NA          | NA          | NA          | NA          |
| SOLID-TIMI 52-EA  | 64.55 (9.25)  | 25.8  | 7.5738 (2.22)  | 5.0038 (1.81)  | NA          | NA          | NA          | NA          |
| n                 | 8111          | 2092  | 8035           | 8036           | NA          | NA          | NA          | NA          |
| SOLID-TIMI 52-EAS | 63.59 (10.4)  | 19.6  | 6.8109 (2.005) | 4.2585 (1.65)  | NA          | NA          | NA          | NA          |
| n                 | 255           | 50    | 255            | 252            | NA          | NA          | NA          | NA          |
| SOLID-TIMI 52-SA  | 58.28 (9.67)  | 15.4  | 8.1573 (2.396) | 5.6544 (2.074) | NA          | NA          | NA          | NA          |
| n                 | 117           | 18    | 116            | 116            | NA          | NA          | NA          | NA          |
| SOLID-TIMI 52-HA  | 63.29 (9.74)  | 28.3  | 7.4106 (2.171) | 4.8 (1.792)    | NA          | NA          | NA          | NA          |
| n                 | 893           | 253   | 875            | 875            | NA          | NA          | NA          | NA          |
| STABILITY-AA      | 62.86 (10.22) | 25.4  | 5.6873 (1.67)  | 3.3362 (1.379) | NA          | NA          | NA          | NA          |
| n                 | 118           | 30    | 118            | 118            | NA          | NA          | NA          | NA          |
| STABILITY-EA      | 65.91 (8.98)  | 17.6  | 6.8245 (1.839) | 4.3007 (1.427) | NA          | NA          | NA          | NA          |
| n                 | 8499          | 1499  | 8490           | 8487           | NA          | NA          | NA          | NA          |
| STABILITY-EAS     | 64.25 (8.72)  | 22.3  | 6.7628 (1.87)  | 4.1576 (1.466) | NA          | NA          | NA          | NA          |
| n                 | 714           | 159   | 714            | 714            | NA          | NA          | NA          | NA          |
| STABILITY-SA      | 58.35 (10.84) | 13    | 7.5481 (1.977) | 4.8583 (1.697) | NA          | NA          | NA          | NA          |
| n                 | 354           | 46    | 348            | 347            | NA          | NA          | NA          | NA          |
| STABILITY-HL      | 66.34 (8.41)  | 17.2  | 6.6986 (1.768) | 4.2348 (1.444) | NA          | NA          | NA          | NA          |
| n                 | 500           | 86    | 500            | 500            | NA          | NA          | NA          | NA          |
| WHI-EA            | 66.2 (6.7)    | 100   | 6.1 (1.7)      | 3.9 (1.4)      | 0.6 (0.2)   | 1.8 (1.0)   | 0.0 (0.0)   | 0.2 (0.1)   |
| n                 | 21867         | 21867 | 21841          | 3669           | 3669        | 3669        | 3669        | 3669        |
| WHI-AA            | 65.0 (6.6)    | 100   | 5.6 (1.7)      | 3.2 (1.5)      | 0.5 (0.2)   | 1.9 (1.0)   | 0.0 (0.0)   | 0.2 (0.2)   |
| n                 | 3501          | 3501  | 3497           | 712            | 712         | 712         | 713         | 712         |
| Total             | 134,770       |       | 133,273        | 78,123         | 58,450      | 61,248      | 56,263      | 42,615      |

Abbreviations: EA, European Ancestry; AA, African Ancestry; HA, Hispanic American; EAS, East Asian; SA, South Asian.



Table S5. Blood cell specific expression quantitative trait loci (eQTL) datasets used for lookups of white blood cell trait variants identified in the present study

| Datasets                                                                                                | Reference [PMID]                                                                                                                                                                                       |
|---------------------------------------------------------------------------------------------------------|--------------------------------------------------------------------------------------------------------------------------------------------------------------------------------------------------------|
| Blood cell related eQTL studies included fresh lymphocytes                                              | 17873875                                                                                                                                                                                               |
| Fresh leukocytes                                                                                        | 19966804                                                                                                                                                                                               |
| Leukocyte samples in individuals with Celiac disease                                                    | 19128478                                                                                                                                                                                               |
| Whole blood samples                                                                                     | 18344981, 21829388, 22692066, 23818875, 23359819, 23880221, 24013639, 23157493, 23715323, 24092820, 24314549, 24956270, 24592274, 24728292, 24740359, 25609184, 22563384, 25474530, 25816334, 25578447 |
| Lymphoblastoid cell lines derived from asthmatic children                                               | 17873877, 23345460                                                                                                                                                                                     |
| Lymphoblastoid cell lines derived from 3 HapMap populations                                             | 17873874                                                                                                                                                                                               |
| Lymphoblastoid cell lines derived from HapMap CEU populations                                           | 18193047                                                                                                                                                                                               |
| Lymphoblastoid cell lines from population samples                                                       | 19644074, 22286170, 22941192, 23755361, 23995691, 25010687, 25951796                                                                                                                                   |
| Neutrophils                                                                                             | 26151758, 26259071                                                                                                                                                                                     |
| CD19+ B cells                                                                                           | 22446964                                                                                                                                                                                               |
| Primary phytohaemagglutinin (PHA)-stimulated T cells                                                    | 19644074, 23755361                                                                                                                                                                                     |
| CD4+ T cells                                                                                            | 20833654                                                                                                                                                                                               |
| Peripheral blood monocytes                                                                              | 19222302, 20502693, 22446964, 23300628, 25951796, 26019233                                                                                                                                             |
| CD14+ monocytes before and after stimulation with lipopolysaccharide (LPS) or interferon-gamma          | 24604202                                                                                                                                                                                               |
| CD11+ dendritic cells before and after Mycobacterium tuberculosis infection                             | 22233810                                                                                                                                                                                               |
| Dendritic cells before or after stimulation with lipopolysaccharide (LPS), influenza or interferon-beta | 24604203                                                                                                                                                                                               |
| Micro-RNA QTLs                                                                                          | 21691150, 26020509                                                                                                                                                                                     |
| DNase-I QTLs                                                                                            | 22307276                                                                                                                                                                                               |
| Histone acetylation QTLs                                                                                | 25799442                                                                                                                                                                                               |
| Ribosomal occupancy QTLs                                                                                | 25657249                                                                                                                                                                                               |
| Splicing QTLs                                                                                           | 25685889                                                                                                                                                                                               |
| Micro-RNA QTLs                                                                                          | 25791433                                                                                                                                                                                               |
| Splicing QTLs                                                                                           | 25685889                                                                                                                                                                                               |
| ScanDB eQTL data <sup>a</sup>                                                                           | <a href="http://www.scandb.org/newinterface/about.html">http://www.scandb.org/newinterface/about.html</a>                                                                                              |
| Genotype-Tissue Expression (GTEx) whole blood eQTL <sup>b</sup>                                         | 23715323, <a href="http://www.gtexportal.org">www.gtexportal.org</a>                                                                                                                                   |
| eQTL databases at University of Chicago                                                                 | <a href="http://eqtl.uchicago.edu/Home.html">http://eqtl.uchicago.edu/Home.html</a>                                                                                                                    |
| Long non-coding RNAs in monocytes                                                                       | 25025429                                                                                                                                                                                               |

<sup>a</sup>ScanDB cis-eQTLs were limited to those with  $P < 1.0E-6$  and trans-eQTLs with  $P < 5.0E-8$ .

<sup>b</sup>GTEx Analysis V4 for 13 tissues were downloaded from the GTEx Portal ([www.gtexportal.org](http://www.gtexportal.org)) and results were filtered using the following criteria: Splicing QTL (sQTL) results generated with sQTLseeker with false discovery rate  $P \leq 0.05$  were retained. For all gene-level eQTLs, if at least 1 SNP passed the tissue-specific empirical threshold in GTEx, the best SNP for that eQTL was always retained. All gene-level eQTL SNPs with  $P < 1.67E-11$  were also retained, reflecting a global threshold correction of  $P = 0.05 / (30,000 \text{ genes} \times 1,000,000 \text{ tests})$ .

See Table S6 in the accompanying Excel file.

Table S7. Independent single nucleotide variants (N=28) associated with white blood cell traits in European only and combined All ancestries meta-analysis

| Trait (population) | dbSNPID                 | Chr | Pos         | Alt | Ref | EAF     | Gene                   | Annotation     | AA Substitution | CADD Score | Discovery |         |        |          | Replication |             |           |        |          |
|--------------------|-------------------------|-----|-------------|-----|-----|---------|------------------------|----------------|-----------------|------------|-----------|---------|--------|----------|-------------|-------------|-----------|--------|----------|
|                    |                         |     |             |     |     |         |                        |                |                 |            | N         | Beta    | SE     | P        | N           | EAF         | Beta      | SE     | P        |
| WBC (EA)           | rs4925663               | 1   | 247,614,617 | T   | C   | 0.39    | <i>OR2B11</i>          | Missense       | p.Gly223Asp     | 24.10      | 107,345   | 0.0251  | 0.0046 | 4.55E-08 | 17,897      | 0.4         | 0.01693   | 0.0112 | 0.132    |
| WBC (All)          | rs4925663               | 1   | 247,614,617 | T   | C   | 0.37    | <i>OR2B11</i>          | Missense       | p.Gly223Asp     | 24.10      | 131,513   | 0.026   | 0.0042 | 5.85E-10 | 17,897      | 0.4         | 0.01693   | 0.0112 | 0.132    |
| WBC (All)          | rs1260326               | 2   | 27,730,940  | C   | T   | 0.62    | <i>GCKR</i>            | Missense       | p.Leu446Pro     | 0.11       | 132,764   | -0.0299 | 0.0044 | 1.44E-11 | 17,897      | 0.6         | -0.0437   | 0.012  | 0.00027  |
| WBC (EA)           | rs1260326               | 2   | 27,730,940  | C   | T   | 0.58    | <i>GCKR</i>            | Missense       | p.Leu446Pro     | 0.11       | 108,596   | -0.0298 | 0.0048 | 4.01E-10 | 17,897      | 0.6         | -0.0437   | 0.012  | 0.00027  |
| WBC (All)          | rs2276853               | 3   | 47,282,303  | A   | G   | 0.58    | <i>KIF9</i>            | Missense       | p.Arg573Trp     | 32.00      | 132,764   | 0.023   | 0.0042 | 3.65E-08 | 17,897      | 0.6         | 0.02516   | 0.0116 | 0.03     |
| WBC (All)          | rs9374080               | 6   | 109,616,420 | C   | T   | 0.43    | <i>CCDC162P</i>        | Intronic       |                 | 3.79       | 132,764   | 0.0227  | 0.0041 | 4.01E-08 | 17,897      | 0.46        | 0.02512   | 0.0113 | 0.0255   |
| LYM (All)          | rs2229094               | 6   | 31,540,556  | C   | T   | 0.26    | <i>LTA</i>             | Missense       | p.Cys13Arg      | 0.03       | 59,978    | 0.0451  | 0.0071 | 1.55E-10 | 16,711      | 0.25        | 0.07796   | 0.0175 | 8.54E-06 |
| LYM (EA)           | rs2229094               | 6   | 31,540,556  | C   | T   | 0.26    | <i>LTA</i>             | Missense       | p.Cys13Arg      | 0.03       | 47,105    | 0.0456  | 0.0081 | 1.89E-08 | 16,711      | 0.25        | 0.07796   | 0.0175 | 8.54E-06 |
| NEU (All)          | rs185819 <sup>a</sup>   | 6   | 32,050,067  | C   | T   | 0.52    | <i>TNXB</i>            | Missense       | p.His1161Arg    | 0.00       | 76,838    | 0.0308  | 0.0058 | 9.65E-08 | 16,669      | 0.47        | 0.02635   | 0.0158 | 0.0948   |
| WBC (All)          | rs185819                | 6   | 32,050,067  | C   | T   | 0.51    | <i>TNXB</i>            | Missense       | p.His1161Arg    | 0.00       | 132,764   | 0.0307  | 0.0049 | 4.02E-10 | 17,897      | 0.47        | 0.03395   | 0.0149 | 0.0224   |
| WBC (All)          | rs1050331               | 7   | 44,808,091  | G   | T   | 0.48    | <i>ZMIZ2</i>           | 3'UTR          |                 | 5.30       | 123,297   | 0.0235  | 0.0041 | 1.25E-08 | 15,910      | 0.48        | 0.01149   | 0.0117 | 0.325    |
| MON (All)          | rs4917014               | 7   | 50,305,863  | G   | T   | 0.28    | <i>C7orf72-IKZF1</i>   | Intergenic     |                 | 1.91       | 57,183    | -0.038  | 0.0068 | 1.97E-08 | 16,669      | 0.32        | -0.0478   | 0.0122 | 8.92E-05 |
| MON (EA)           | rs10107630              | 8   | 130,603,635 | T   | C   | 0.57    | <i>CCDC26</i>          | Intronic       |                 | 5.39       | 44,325    | -0.0683 | 0.0069 | 2.45E-23 | 15,781      | 0.57        | -0.1069   | 0.0118 | 1.06E-19 |
| MON (All)          | rs10107630              | 8   | 130,603,635 | T   | C   | 0.56    | <i>CCDC26</i>          | Intronic       |                 | 5.39       | 57,183    | -0.0663 | 0.006  | 3.11E-28 | 15,781      | 0.57        | -0.1069   | 0.0118 | 1.06E-19 |
| WBC (All)          | rs1982151               | 9   | 86,617,265  | G   | A   | 0.71    | <i>RM11</i>            | Missense       | p.Asn455Ser     | 0.00       | 132,764   | 0.0255  | 0.0044 | 6.97E-09 | 17,897      | 0.74        | 0.02095   | 0.0123 | 0.0896   |
| WBC (EA)           | rs4409764               | 10  | 101,284,237 | G   | T   | 0.51    | <i>GOT1-LINC01475</i>  | Intergenic     |                 | 7.60       | 108,596   | -0.0255 | 0.0046 | 3.34E-08 | 17,897      | 0.53        | -4.00E-04 | 0.0115 | 0.974    |
| MON (All)          | rs6584283               | 10  | 101,291,593 | C   | T   | 0.55    | <i>LINC01475</i>       | Intronic ncRNA |                 | -          | 57,183    | -0.035  | 0.0061 | 9.55E-09 | 16,669      | 0.53        | -0.0121   | 0.0121 | 0.319    |
| WBC (EA)           | rs1935                  | 10  | 64,927,823  | G   | C   | 0.49    | <i>JMJD1C</i>          | Missense       | p.Glu2353Asp    | 16.64      | 108,596   | -0.0261 | 0.0047 | 2.46E-08 | 17,897      | 0.46        | -0.0271   | 0.0117 | 0.0206   |
| NEU (All)          | rs3747869               | 10  | 73,520,632  | C   | A   | 0.9     | <i>C10orf54 (DD1a)</i> | Missense       | p.Asp187Glu     | 10.88      | 76,838    | 0.0494  | 0.0087 | 1.58E-08 | 16,669      | 0.9         | 0.07326   | 0.019  | 0.00012  |
| WBC (EA)           | rs3747869               | 10  | 73,520,632  | C   | A   | 0.9     | <i>C10orf54 (DD1a)</i> | Missense       | p.Asp187Glu     | 10.88      | 108,596   | 0.0398  | 0.0073 | 4.26E-08 | 17,897      | 0.9         | 0.08289   | 0.0184 | 6.40E-06 |
| NEU (EA)           | rs3747869               | 10  | 73,520,632  | C   | A   | 0.9     | <i>C10orf54 (DD1a)</i> | Missense       | p.Asp187Glu     | 10.88      | 60,851    | 0.0533  | 0.0095 | 2.11E-08 | 16,669      | 0.9         | 0.07326   | 0.019  | 0.00012  |
| WBC (All)          | rs3747869               | 10  | 73,520,632  | C   | A   | 0.91    | <i>C10orf54 (DD1a)</i> | Missense       | p.Asp187Glu     | 10.88      | 132,764   | 0.0381  | 0.0068 | 2.31E-08 | 17,897      | 0.9         | 0.08289   | 0.0184 | 6.40E-06 |
| NEU (EA)           | rs144349650             | 11  | 55,432,976  | G   | C   | 0.00069 | <i>OR4C6</i>           | Missense       | p.Leu112Val     | 13.09      | 60,851    | 0.7176  | 0.1096 | 5.95E-11 | 16,669      | Monomorphic | NA        | NA     | NA       |
| NEU (All)          | rs144349650             | 11  | 55,432,976  | G   | C   | 0.00071 | <i>OR4C6</i>           | Missense       | p.Leu112Val     | 13.09      | 76,838    | 0.6648  | 0.0962 | 4.92E-12 | 16,669      | Monomorphic | NA        | NA     | NA       |
| WBC (EA)           | rs144349650             | 11  | 55,432,976  | G   | C   | 0.00042 | <i>OR4C6</i>           | Missense       | p.Leu112Val     | 13.09      | 108,596   | 0.7207  | 0.1073 | 1.87E-11 | 17,897      | 2.81E-05    | -0.6178   | 0.9965 | 0.535    |
| WBC (All)          | rs144349650             | 11  | 55,432,976  | G   | C   | 0.00044 | <i>OR4C6</i>           | Missense       | p.Leu112Val     | 13.09      | 132,764   | 0.6379  | 0.0942 | 1.26E-11 | 17,897      | 2.81E-05    | -0.6178   | 0.9965 | 0.535    |
| LYM (EA)           | rs199694284             | 11  | 5,632,403   | C   | T   | 5.3E-05 | <i>TRIM6</i>           | Missense       | p.Val258Ala     | 25.20      | 40,313    | -2.3971 | 0.4458 | 7.56E-08 | 16,711      | 5.98E-05    | -0.9067   | 0.6995 | 0.195    |
| BAS (EA)           | rs4430553               | 12  | 66,698,895  | C   | T   | 0.54    | <i>HELB</i>            | Missense       | p.Leu191Pro     | 5.73       | 44,138    | 0.0404  | 0.0068 | 3.02E-09 | 15,770      | 0.53        | 0.02111   | 0.0116 | 0.0681   |
| BAS (All)          | rs4430553               | 12  | 66,698,895  | C   | T   | 0.56    | <i>HELB</i>            | Missense       | p.Leu191Pro     | 5.73       | 56,707    | 0.0391  | 0.006  | 9.73E-11 | 15,770      | 0.53        | 0.02111   | 0.0116 | 0.0681   |
| LYM (All)          | rs4763879               | 12  | 9,910,164   | A   | G   | 0.32    | <i>CD69</i>            | Intronic       |                 | 3.03       | 59,978    | -0.0366 | 0.0064 | 1.08E-08 | 16,711      | 0.36        | -0.0381   | 0.0119 | 0.00136  |
| LYM (EA)           | rs4763879               | 12  | 9,910,164   | A   | G   | 0.36    | <i>CD69</i>            | Intronic       |                 | 3.03       | 47,105    | -0.0379 | 0.0069 | 3.08E-08 | 16,711      | 0.36        | -0.0381   | 0.0119 | 0.00136  |
| MON (EA)           | rs11625112              | 14  | 23,596,740  | G   | A   | 0.46    | <i>SLCTA8</i>          | Intronic       |                 | 6.34       | 44,325    | -0.0376 | 0.0068 | 3.82E-08 | 16,669      | 0.45        | -0.031    | 0.0115 | 0.00704  |
| WBC (EA)           | rs2306331               | 15  | 51,217,361  | C   | T   | 0.46    | <i>AP4E1</i>           | Missense       | p.Cys88Arg      | 6.49       | 100,571   | -0.0249 | 0.0046 | 6.15E-08 | 15,910      | 0.47        | -0.0174   | 0.0116 | 0.134    |
| MON (EA)           | rs11642873 <sup>a</sup> | 16  | 85,991,705  | C   | A   | 0.2     | <i>IRF8-LINC01082</i>  | Intergenic     |                 | 0.75       | 44,325    | 0.0573  | 0.0085 | 1.41E-11 | 16,669      | 0.2         | 0.11251   | 0.0144 | 6.17E-15 |

|           |            |    |            |   |   |      |                       |            |             |       |         |         |             |          |        |      |         |        |          |
|-----------|------------|----|------------|---|---|------|-----------------------|------------|-------------|-------|---------|---------|-------------|----------|--------|------|---------|--------|----------|
| MON (All) | rs11642873 | 16 | 85,991,705 | C | A | 0.17 | <i>IRF8-LINC01082</i> | Intergenic |             | 0.75  | 57,183  | 0.0561  | 0.0081      | 3.24E-12 | 16,669 | 0.2  | 0.11251 | 0.0144 | 6.17E-15 |
| MON (All) | rs1292053  | 17 | 57,963,537 | G | A | 0.45 | <i>TUBD1</i>          | Missense   | p.Met76Thr  | 5.53  | 57,183  | -0.0359 | 0.006       | 2.55E-09 | 16,669 | 0.44 | -0.0398 | 0.0116 | 0.00061  |
| WBC (All) | rs1292053  | 17 | 57,963,537 | G | A | 0.45 | <i>TUBD1</i>          | Missense   | p.Met76Thr  | 5.53  | 132,764 | -0.0287 | 0.004       | 1.06E-12 | 17,897 | 0.44 | -0.027  | 0.0111 | 0.0151   |
| WBC (EA)  | rs1292053  | 17 | 57,963,537 | G | A | 0.45 | <i>TUBD1</i>          | Missense   | p.Met76Thr  | 5.53  | 108,596 | -0.0304 | 0.0045      | 1.28E-11 | 17,897 | 0.44 | -0.027  | 0.0111 | 0.0151   |
| BAS (All) | rs736289   | 19 | 33,757,062 | C | T | 0.43 | <i>SLC7A10-CEBPA</i>  | Intergenic |             | 0.41  | 56,707  | 0.0343  | 0.0061      | 2.34E-08 | 15,770 | 0.4  | 0.01229 | 0.0116 | 0.291    |
| BAS (EA)  | rs736289   | 19 | 33,757,062 | C | T | 0.39 | <i>SLC7A10-CEBPA</i>  | Intergenic |             | 0.41  | 44,138  | 0.0402  | 0.0069      | 7.02E-09 | 15,770 | 0.4  | 0.01229 | 0.0116 | 0.291    |
| NEU (All) | rs4760     | 19 | 44,153,100 | G | A | 0.14 | <i>CD87 (PLAUR)</i>   | Missense   | p.Lue272Pro | 24.20 | 71,415  | -0.0471 | 0.0079      | 2.33E-09 | 16,669 | 0.15 | -0.044  | 0.0159 | 0.00555  |
| WBC (EA)  | rs4760     | 19 | 44,153,100 | G | A | 0.16 | <i>CD87 (PLAUR)</i>   | Missense   | p.Lue272Pro | 24.20 | 85,685  | -0.043  | 0.0068      | 2.51E-10 | 17,897 | 0.15 | -0.0518 | 0.0153 | 0.00071  |
| WBC (All) | rs4760     | 19 | 44,153,100 | G | A | 0.14 | <i>CD87 (PLAUR)</i>   | Missense   | p.Lue272Pro | 24.20 | 106,384 | -0.0424 | 0.0065      | 8.63E-11 | 17,897 | 0.15 | -0.0518 | 0.0153 | 0.00071  |
| NEU (EA)  | rs4760     | 19 | 44,153,100 | G | A | 0.16 | <i>CD87 (PLAUR)</i>   | Missense   | p.Lue272Pro | 24.20 | 56,112  | -0.0467 | 0.0083      | 1.54E-08 | 16,669 | 0.15 | -0.044  | 0.0159 | 0.00555  |
| WBC (All) | rs3865444  | 19 | 51,727,962 | A | C | 0.28 | <i>CD33</i>           | Upstream   |             | 3.79  | 107,635 | -0.034  | 0.005       | 6.25E-12 | 17,897 | 0.32 | -0.0329 | 0.0118 | 0.00514  |
| WBC (EA)  | rs3865444  | 19 | 51,727,962 | A | C | 0.31 | <i>CD33</i>           | Upstream   |             | 3.79  | 86,936  | -0.0367 | 0.0053      | 3.51E-12 | 17,897 | 0.32 | -0.0329 | 0.0118 | 0.00514  |
| LYM (All) | rs6136489  | 20 | 1,923,734  | G | T | 0.4  | <i>SIRPA-PDYN</i>     | Intergenic |             | 2.52  | 59,978  | -0.0406 | 0.0061      | 3.99E-11 | 16,711 | 0.33 | -0.0096 | 0.0121 | 0.428    |
| WBC (All) | rs6136489  | 20 | 1,923,734  | G | T | 0.39 | <i>SIRPA-PDYN</i>     | Intergenic |             | 2.52  | 132,764 | -0.0246 | 0.0042      | 4.03E-09 | 17,897 | 0.33 | -0.0179 | 0.0116 | 0.122    |
| LYM (EA)  | rs6136489  | 20 | 1,923,734  | G | T | 0.34 | <i>SIRPA-PDYN</i>     | Intergenic |             | 2.52  | 47,105  | -0.0384 | 0.007       | 3.33E-08 | 16,711 | 0.33 | -0.0096 | 0.0121 | 0.428    |
| BAS (EA)  | rs2295764  | 20 | 31,025,163 | G | A | 0.36 | <i>ASXL1</i>          | 3'UTR      |             | 0.10  | 44,138  | -0.0419 | 0.0071      | 3.28E-09 | 15,770 | 0.36 | -0.031  | 0.012  | 0.00978  |
| BAS (All) | rs2295764  | 20 | 31,025,163 | G | A | 0.33 | <i>ASXL1</i>          | 3'UTR      |             | 0.10  | 56,707  | -0.0367 | 0.0064<br>1 | 1.07E-08 | 15,770 | 0.36 | -0.031  | 0.012  | 0.00978  |
| WBC (All) | rs2836878  | 21 | 40,465,534 | A | G | 0.26 | <i>ETS2-PSMG1</i>     | Intergenic |             | 1.82  | 132,764 | -0.0246 | 0.0046      | 8.36E-08 | 17,897 | 0.26 | -0.0264 | 0.0125 | 0.0344   |

Abbreviations: Chr, chromosome; Pos, basepair position; Alt, effect allele; Ref, reference allele; EAF, effect allele frequency; AA, amino acid; CADD, Combined annotation dependent depletion; EA, European ancestry, All, combined European, African, Hispanic American, East Asian and South Asian ancestries; WBC, white blood cell; NEU, neutrophil; MON, monocyte; LYM, lymphocyte; BAS, basophil.

\*Secondary signal identified through conditional analysis.

Table S8. Association between 16 replicated loci and white blood cell subtypes in the discovery meta-analysis. Primary associations are shown in bold.

| dbSNPID   | Chr    | Pos         | Gene            | Alt/Ref | Trait (population) | N              | EAF         | Beta          | SE           | P               |
|-----------|--------|-------------|-----------------|---------|--------------------|----------------|-------------|---------------|--------------|-----------------|
| rs1260326 | 2      | 27,730,940  | <i>GCKR</i>     | C/T     | <b>WBC (EA)</b>    | <b>108,596</b> | <b>0.58</b> | <b>-0.030</b> | <b>0.005</b> | <b>4.01E-10</b> |
|           |        |             |                 |         | WBC (All)          | 132,764        | 0.62        | -0.030        | 0.004        | 1.44E-11        |
|           |        |             |                 |         | WBC (AA)           | 17,200         | 0.85        | -0.039        | 0.016        | 1.44E-02        |
|           |        |             |                 |         | NEU (EA)           | 60,851         | 0.58        | -0.020        | 0.006        | 9.81E-04        |
|           |        |             |                 |         | NEU (All)          | 76,838         | 0.62        | -0.019        | 0.006        | 6.46E-04        |
|           |        |             |                 |         | LYM (EA)           | 47,105         | 0.59        | -0.016        | 0.007        | 2.15E-02        |
|           |        |             |                 |         | LYM (All)          | 59,978         | 0.64        | -0.013        | 0.006        | 3.91E-02        |
|           |        |             |                 |         | BAS (EA)           | 44,138         | 0.59        | -0.022        | 0.007        | 2.17E-03        |
|           |        |             |                 |         | BAS (All)          | 56,707         | 0.64        | -0.021        | 0.006        | 1.04E-03        |
| rs2276853 | 3      | 47,282,303  | <i>KIF9</i>     | A/G     | <b>WBC (All)</b>   | <b>132,764</b> | <b>0.58</b> | <b>0.023</b>  | <b>0.004</b> | <b>3.65E-08</b> |
|           |        |             |                 |         | WBC (EA)           | 108,596        | 0.60        | 0.022         | 0.005        | 1.39E-06        |
|           |        |             |                 |         | NEU (EA)           | 60,851         | 0.60        | 0.017         | 0.006        | 4.56E-03        |
|           |        |             |                 |         | NEU (All)          | 76,838         | 0.59        | 0.018         | 0.005        | 8.24E-04        |
|           |        |             |                 |         | LYM (EA)           | 47,105         | 0.60        | 0.015         | 0.007        | 2.70E-02        |
|           |        |             |                 |         | LYM (All)          | 59,978         | 0.58        | 0.018         | 0.006        | 2.52E-03        |
|           |        |             |                 |         | LYM (AA)           | 9,423          | 0.53        | 0.039         | 0.015        | 7.86E-03        |
| rs2229094 | 6      | 31,540,556  | <i>LTA</i>      | C/T     | <b>LYM (EA)</b>    | <b>47,105</b>  | <b>0.26</b> | <b>0.046</b>  | <b>0.008</b> | <b>1.89E-08</b> |
|           |        |             |                 |         | LYM (All)          | 59,978         | 0.26        | 0.045         | 0.007        | 1.55E-10        |
|           |        |             |                 |         | LYM (AA)           | 9,423          | 0.28        | 0.044         | 0.017        | 7.30E-03        |
|           |        |             |                 |         | WBC (EA)           | 108,596        | 0.26        | 0.035         | 0.006        | 2.73E-09        |
|           |        |             |                 |         | WBC (All)          | 132,764        | 0.26        | 0.031         | 0.005        | 5.40E-09        |
|           |        |             |                 |         | NEU (All)          | 76,838         | 0.26        | 0.015         | 0.006        | 1.74E-02        |
|           |        |             |                 |         | BAS (EA)           | 44,138         | 0.26        | 0.026         | 0.008        | 1.37E-03        |
|           |        |             |                 |         | BAS (All)          | 56,707         | 0.27        | 0.020         | 0.007        | 5.59E-03        |
| rs185819  | 6      | 32,050,067  | <i>TNXB</i>     | C/T     | <b>WBC (All)</b>   | <b>132,764</b> | <b>0.51</b> | <b>0.031</b>  | <b>0.005</b> | <b>4.02E-10</b> |
|           |        |             |                 |         | WBC (EA)           | 108,596        | 0.52        | 0.029         | 0.006        | 2.62E-07        |
|           |        |             |                 |         | WBC (AA)           | 17,200         | 0.47        | 0.035         | 0.012        | 4.38E-03        |
|           |        |             |                 |         | NEU (EA)           | 60,851         | 0.52        | 0.025         | 0.007        | 1.33E-04        |
|           |        |             |                 |         | NEU (All)          | 76,838         | 0.52        | 0.031         | 0.006        | 9.65E-08        |
|           |        |             |                 |         | NEU (AA)           | 9,734          | 0.47        | 0.058         | 0.016        | 1.80E-04        |
|           |        |             |                 |         | MON (EA)           | 44,325         | 0.51        | 0.020         | 0.008        | 1.14E-02        |
|           |        |             |                 |         | MON (All)          | 57,183         | 0.51        | 0.021         | 0.007        | 1.89E-03        |
|           |        |             |                 |         | LYM (EA)           | 47,105         | 0.51        | 0.015         | 0.007        | 3.93E-02        |
|           |        |             |                 |         | LYM (All)          | 59,978         | 0.50        | 0.019         | 0.006        | 3.23E-03        |
|           |        |             |                 |         | LYM (AA)           | 9,423          | 0.47        | 0.041         | 0.015        | 5.79E-03        |
|           |        |             |                 |         | EOS (EA)           | 32,517         | 0.48        | 0.019         | 0.009        | 4.39E-02        |
|           |        |             |                 |         | EOS (All)          | 44,249         | 0.48        | 0.016         | 0.008        | 3.58E-02        |
|           |        |             |                 |         | BAS (EA)           | 44,138         | 0.51        | 0.020         | 0.007        | 6.87E-03        |
| BAS (All) | 56,707 | 0.51        | 0.020           | 0.006   | 1.90E-03           |                |             |               |              |                 |
| rs9374080 | 6      | 109,616,420 | <i>CCDC162P</i> | C/T     | <b>WBC (All)</b>   | <b>132,764</b> | <b>0.43</b> | <b>0.023</b>  | <b>0.004</b> | <b>4.01E-08</b> |
|           |        |             |                 |         | WBC (EA)           | 108,596        | 0.44        | 0.021         | 0.005        | 2.67E-06        |
|           |        |             |                 |         | WBC (AA)           | 17,200         | 0.36        | 0.024         | 0.011        | 3.74E-02        |
|           |        |             |                 |         | NEU (EA)           | 60,851         | 0.44        | 0.015         | 0.006        | 1.08E-02        |
|           |        |             |                 |         | NEU (All)          | 76,838         | 0.42        | 0.018         | 0.005        | 5.69E-04        |
|           |        |             |                 |         | MON (All)          | 57,183         | 0.43        | 0.014         | 0.006        | 2.71E-02        |
|           |        |             |                 |         | BAS (EA)           | 44,138         | 0.45        | 0.026         | 0.007        | 1.34E-04        |
|           |        |             |                 |         | BAS (All)          | 56,707         | 0.43        | 0.024         | 0.006        | 9.85E-05        |

|            |        |            |                        |       |                  |                |                |               |                |                 |
|------------|--------|------------|------------------------|-------|------------------|----------------|----------------|---------------|----------------|-----------------|
| rs4917014  | 7      | 50,305,863 | <i>C7orf72-IKZF1</i>   | G/T   | <b>MON (All)</b> | <b>57,183</b>  | <b>0.28458</b> | <b>-0.038</b> | <b>0.00677</b> | <b>1.97E-08</b> |
|            |        |            |                        |       | MON (EA)         | 44,325         | 0.32243        | -0.0336       | 0.00726        | 3.84E-06        |
|            |        |            |                        |       | MON (AA)         | 9,406          | 0.08266        | -0.0606       | 0.02683        | 2.40E-02        |
| rs3747869  | 10     | 73,520,632 | <i>C10orf54 (DD1a)</i> | C/A   | <b>WBC (EA)</b>  | <b>108,596</b> | <b>0.90</b>    | <b>0.040</b>  | <b>0.007</b>   | <b>4.26E-08</b> |
|            |        |            |                        |       | WBC (All)        | 132,764        | 0.91           | 0.038         | 0.007          | 2.31E-08        |
|            |        |            |                        |       | <b>NEU (EA)</b>  | <b>60,851</b>  | <b>0.90</b>    | <b>0.053</b>  | <b>0.010</b>   | <b>2.11E-08</b> |
|            |        |            |                        |       | NEU (All)        | 76,838         | 0.90           | 0.049         | 0.009          | 1.58E-08        |
|            |        |            |                        |       | MON (EA)         | 44,325         | 0.90           | 0.041         | 0.011          | 2.44E-04        |
|            |        |            |                        |       | MON (All)        | 57,183         | 0.91           | 0.037         | 0.010          | 3.77E-04        |
|            |        |            |                        |       | EOS (EA)         | 32,517         | 0.82           | 0.033         | 0.014          | 1.58E-02        |
| EOS (All)  | 44,249 | 0.85       | 0.025                  | 0.012 | 4.23E-02         |                |                |               |                |                 |
| rs1935     | 10     | 64,927,823 | <i>JMJD1C</i>          | G/C   | <b>WBC (EA)</b>  | <b>108,596</b> | <b>0.49</b>    | <b>-0.026</b> | <b>0.005</b>   | <b>2.46E-08</b> |
|            |        |            |                        |       | WBC (All)        | 132,764        | 0.46           | -0.025        | 0.004          | 6.57E-09        |
|            |        |            |                        |       | NEU (EA)         | 60,851         | 0.49           | -0.024        | 0.006          | 4.00E-05        |
|            |        |            |                        |       | NEU (All)        | 76,838         | 0.46           | -0.022        | 0.005          | 4.99E-05        |
|            |        |            |                        |       | LYM (All)        | 59,978         | 0.45           | -0.013        | 0.006          | 2.86E-02        |
|            |        |            |                        |       | EOS (All)        | 44,249         | 0.41           | -0.020        | 0.007          | 6.33E-03        |
| rs4763879  | 12     | 9,910,164  | <i>CD69</i>            | A/G   | <b>LYM (EA)</b>  | <b>47,105</b>  | <b>0.36</b>    | <b>-0.038</b> | <b>0.007</b>   | <b>3.08E-08</b> |
|            |        |            |                        |       | LYM (All)        | 59,978         | 0.32           | -0.037        | 0.006          | 1.08E-08        |
|            |        |            |                        |       | WBC (EA)         | 108,596        | 0.36           | -0.014        | 0.005          | 2.63E-03        |
|            |        |            |                        |       | WBC (All)        | 132,764        | 0.33           | -0.013        | 0.004          | 2.94E-03        |
| rs11625112 | 14     | 23,596,740 | <i>SLC7A8</i>          | G/A   | <b>MON (EA)</b>  | <b>44,325</b>  | <b>0.46</b>    | <b>-0.038</b> | <b>0.007</b>   | <b>3.82E-08</b> |
|            |        |            |                        |       | MON (All)        | 57,183         | 0.46           | -0.030        | 0.006          | 4.20E-07        |
|            |        |            |                        |       | EOS (EA)         | 32,517         | 0.42           | -0.021        | 0.008          | 1.17E-02        |
|            |        |            |                        |       | EOS (All)        | 44,249         | 0.43           | -0.021        | 0.007          | 2.77E-03        |
|            |        |            |                        |       | BAS (EA)         | 44,138         | 0.46           | -0.031        | 0.007          | 7.76E-06        |
|            |        |            |                        |       | BAS (All)        | 56,707         | 0.46           | -0.026        | 0.006          | 1.07E-05        |
| rs11642873 | 16     | 85,991,705 | <i>IRF8-LINC01082</i>  | C/A   | <b>MON (EA)</b>  | <b>44,325</b>  | <b>0.20</b>    | <b>0.057</b>  | <b>0.008</b>   | <b>1.41E-11</b> |
|            |        |            |                        |       | MON (All)        | 57,183         | 0.17           | 0.056         | 0.008          | 3.24E-12        |
|            |        |            |                        |       | EOS (EA)         | 32,517         | 0.18           | 0.036         | 0.010          | 5.94E-04        |
|            |        |            |                        |       | EOS (All)        | 44,249         | 0.15           | 0.033         | 0.010          | 8.18E-04        |
|            |        |            |                        |       | BAS (EA)         | 44,138         | 0.20           | 0.021         | 0.009          | 1.53E-02        |
|            |        |            |                        |       | BAS (All)        | 56,707         | 0.17           | 0.016         | 0.008          | 4.73E-02        |
| rs1292053  | 17     | 57,963,537 | <i>TUBD1</i>           | G/A   | <b>WBC (EA)</b>  | <b>108,596</b> | <b>0.45</b>    | <b>-0.030</b> | <b>0.004</b>   | <b>1.28E-11</b> |
|            |        |            |                        |       | WBC (All)        | 132,764        | 0.45           | -0.029        | 0.004          | 1.06E-12        |
|            |        |            |                        |       | WBC (AA)         | 17,200         | 0.48           | -0.029        | 0.011          | 8.31E-03        |
|            |        |            |                        |       | NEU (EA)         | 60,851         | 0.45           | -0.023        | 0.006          | 1.04E-04        |
|            |        |            |                        |       | NEU (All)        | 76,838         | 0.45           | -0.020        | 0.005          | 1.28E-04        |
|            |        |            |                        |       | MON (EA)         | 44,325         | 0.45           | -0.032        | 0.007          | 2.25E-06        |
|            |        |            |                        |       | <b>MON (All)</b> | <b>57,183</b>  | <b>0.45</b>    | <b>-0.036</b> | <b>0.006</b>   | <b>2.55E-09</b> |
|            |        |            |                        |       | MON (AA)         | 9,406          | 0.48           | -0.035        | 0.015          | 1.80E-02        |
|            |        |            |                        |       | LYM (EA)         | 47,105         | 0.44           | -0.016        | 0.007          | 1.46E-02        |
|            |        |            |                        |       | LYM (All)        | 59,978         | 0.45           | -0.013        | 0.006          | 3.05E-02        |
| rs4760     | 19     | 44,153,100 | <i>CD87 (PLAUR)</i>    | G/A   | <b>NEU (EA)</b>  | <b>56,112</b>  | <b>0.16</b>    | <b>-0.047</b> | <b>0.008</b>   | <b>1.54E-08</b> |
|            |        |            |                        |       | NEU (All)        | 71,415         | 0.14           | -0.047        | 0.008          | 2.33E-09        |
|            |        |            |                        |       | <b>WBC (EA)</b>  | <b>85,685</b>  | <b>0.16</b>    | <b>-0.043</b> | <b>0.007</b>   | <b>2.51E-10</b> |
|            |        |            |                        |       | WBC (All)        | 106,384        | 0.14           | -0.042        | 0.007          | 8.63E-11        |
| rs3865444  | 19     | 51,727,962 | <i>CD33</i>            | A/C   | <b>WBC (EA)</b>  | <b>86,936</b>  | <b>0.31</b>    | <b>-0.037</b> | <b>0.005</b>   | <b>3.51E-12</b> |
|            |        |            |                        |       | WBC (All)        | 107,635        | 0.28           | -0.034        | 0.005          | 6.25E-12        |

|           |    |            |                   |     |                  |                |             |               |              |                 |
|-----------|----|------------|-------------------|-----|------------------|----------------|-------------|---------------|--------------|-----------------|
|           |    |            |                   |     | NEU (EA)         | 57,363         | 0.31        | -0.025        | 0.006        | 1.15E-04        |
|           |    |            |                   |     | NEU (All)        | 72,666         | 0.28        | -0.021        | 0.006        | 3.26E-04        |
|           |    |            |                   |     | MON (EA)         | 40,837         | 0.31        | -0.020        | 0.008        | 9.46E-03        |
|           |    |            |                   |     | MON (All)        | 53,011         | 0.28        | -0.016        | 0.007        | 2.51E-02        |
|           |    |            |                   |     | EOS (EA)         | 29,046         | 0.28        | -0.029        | 0.010        | 2.16E-03        |
|           |    |            |                   |     | EOS (All)        | 40,099         | 0.25        | -0.025        | 0.009        | 3.09E-03        |
| rs2295764 | 20 | 31,025,163 | <i>ASXL1</i>      | G/A | <b>BAS (EA)</b>  | <b>44,138</b>  | <b>0.36</b> | <b>-0.042</b> | <b>0.007</b> | <b>3.28E-09</b> |
|           |    |            |                   |     | BAS (All)        | 56,707         | 0.33        | -0.037        | 0.006        | 1.07E-08        |
|           |    |            |                   |     | WBC (AA)         | 17,200         | 0.20        | -0.029        | 0.013        | 3.23E-02        |
|           |    |            |                   |     | MON (EA)         | 44,325         | 0.36        | -0.032        | 0.007        | 5.64E-06        |
|           |    |            |                   |     | MON (All)        | 57,183         | 0.33        | -0.026        | 0.006        | 3.95E-05        |
|           |    |            |                   |     | EOS (EA)         | 32,517         | 0.32        | -0.027        | 0.009        | 2.14E-03        |
|           |    |            |                   |     | EOS (All)        | 44,249         | 0.30        | -0.025        | 0.008        | 9.81E-04        |
| rs2836878 | 21 | 40,465,534 | <i>ETS2-PSMG1</i> | A/G | <b>WBC (All)</b> | <b>132,764</b> | <b>0.26</b> | <b>-0.025</b> | <b>0.005</b> | <b>8.36E-08</b> |
|           |    |            |                   |     | WBC (EA)         | 108,596        | 0.27        | -0.024        | 0.005        | 7.49E-07        |
|           |    |            |                   |     | NEU (EA)         | 60,851         | 0.28        | -0.025        | 0.006        | 1.08E-04        |
|           |    |            |                   |     | NEU (All)        | 76,838         | 0.26        | -0.025        | 0.006        | 3.38E-05        |
|           |    |            |                   |     | MON (EA)         | 44,325         | 0.28        | -0.026        | 0.008        | 7.28E-04        |
|           |    |            |                   |     | MON (All)        | 57,183         | 0.25        | -0.022        | 0.007        | 1.69E-03        |
|           |    |            |                   |     | BAS (EA)         | 44,138         | 0.28        | -0.019        | 0.008        | 1.29E-02        |
|           |    |            |                   |     | BAS (All)        | 56,707         | 0.25        | -0.018        | 0.007        | 9.80E-03        |

Abbreviations: Chr, chromosome; Pos, basepair position; Alt, effect allele; Ref, reference allele; EAF, effect allele frequency; EA, European ancestry; AA, African ancestry; All, combined European, African, Hispanic American, East Asian and South Asian ancestries; WBC, white blood cell; NEU, neutrophil; MON, monocyte; LYM, lymphocyte; EOS, eosinophils; BAS, basophils.

See Table S9 in the accompanying Excel file



Table S10. Genes associated with white blood cell and differential counts identified using gene-based association meta-analysis

| Trait      | Population | Gene                 | Test        | Chr       | Number of variants | Discovery      |                  |               |              |                |              | Replication |              |               |                |              |
|------------|------------|----------------------|-------------|-----------|--------------------|----------------|------------------|---------------|--------------|----------------|--------------|-------------|--------------|---------------|----------------|--------------|
|            |            |                      |             |           |                    | N              | P                | Beta          | S.D.         | MAF cutoff     | cMAC         | Test        | N            | P             | Beta           | S.D.         |
| WBC        | EA         | <i>CXCR2</i>         | SKAT        | 2         | 9                  | 108,596        | 1.241E-14        | -0.223        | 0.029        | 1              | 3,725        | SKAT        | 2,898        | 0.0173        | -0.406         | 0.169        |
| WBC        | All        | <i>CXCR2</i>         | SKAT        | 2         | 8                  | 138,814        | 9.48E-15         | -0.193        | 0.027        | 1              | 10,438       |             |              |               |                |              |
| WBC        | EA         | <i>CXCR2</i>         | VT          | 2         | 9                  | 108,596        | 7.239E-14        | -0.223        | 0.029        | 0.012          | 3,725        | VT          | 2,898        | 0.053         | -0.406         | 0.169        |
| WBC        | All        | <i>CXCR2</i>         | VT          | 2         | 5                  | 138,814        | 3.56E-13         | -0.21         | 0.028        | 0.0023         | 10,438       |             |              |               |                |              |
| WBC        | All        | <i>JAK2</i>          | VT          | 9         | 6                  | 138,814        | 2.682E-06        | 0.334         | 0.066        | 0.00036        | 8,045        | VT          | 2,898        | 0.0091        | -0.505         | 0.163        |
| <b>WBC</b> | <b>EA</b>  | <b><i>TAF3</i></b>   | <b>VT</b>   | <b>10</b> | <b>6</b>           | <b>108,596</b> | <b>1.583E-06</b> | <b>0.328</b>  | <b>0.064</b> | <b>0.00037</b> | <b>6,848</b> | <b>VT</b>   | 2,898        | <b>NA</b>     | <b>NA</b>      | <b>NA</b>    |
| NEU        | EA         | <i>CXCR2</i>         | SKAT        | 2         | 8                  | 60,851         | 6.853E-09        | -0.221        | 0.038        | 1              | 2,950        | SKAT        | 1,285        | 0.190         | -0.017         | 0.236        |
| NEU        | All        | <i>CXCR2</i>         | SKAT        | 2         | 7                  | 77,223         | 5.062E-09        | -0.203        | 0.035        | 1              | 9,252        |             |              |               |                |              |
| NEU        | EA         | <i>CXCR2</i>         | VT          | 2         | 8                  | 60,851         | 2.495E-08        | -0.221        | 0.038        | 0.0185         | 2,950        | VT          | 1,285        | 0.580         | -0.392         | 0.335        |
| NEU        | All        | <i>CXCR2</i>         | VT          | 2         | 4                  | 77,223         | 2.128E-08        | -0.218        | 0.037        | 0.0023         | 9,252        |             |              |               |                |              |
| NEU        | All        | <i>JAK2</i>          | VT          | 9         | 6                  | 77,223         | 1.553E-07        | 0.431         | 0.077        | 0.00054        | 6,388        | VT          | 1,285        | NA            | NA             | NA           |
| <b>NEU</b> | <b>EA</b>  | <b><i>OR4C6</i></b>  | <b>SKAT</b> | <b>11</b> | <b>15</b>          | <b>60,851</b>  | <b>2.561E-08</b> | <b>0.109</b>  | <b>0.044</b> | <b>1</b>       | <b>512</b>   | <b>SKAT</b> | <b>1,285</b> | <b>0.4844</b> | <b>-0.1455</b> | <b>0.198</b> |
| NEU        | EA         | <i>IL17RA</i>        | SKAT        | 22        | 18                 | 44,325         | 1.004E-16        | -0.128        | 0.026        | 1              | 10,016       | SKAT        | 1,285        | 0.949         | -0.018         | 0.176        |
| <b>NEU</b> | <b>AA</b>  | <b><i>ZNF439</i></b> | <b>VT</b>   | <b>19</b> | <b>4</b>           | <b>10,119</b>  | <b>9.566E-07</b> | <b>-1.099</b> | <b>0.221</b> | <b>0.083</b>   | <b>1,688</b> | <b>VT</b>   | 1,285        | <b>NA</b>     | <b>NA</b>      | <b>NA</b>    |
| MON        | All        | <i>IL17RA</i>        | SKAT        | 22        | 19                 | 57,567         | 1.174E-18        | -0.104        | 0.023        | 1              | 23,595       | SKAT        | 1,285        | 0.972         | -0.004         | 0.176        |
| <b>LYM</b> | <b>All</b> | <b><i>TBX3</i></b>   | <b>VT</b>   | <b>12</b> | <b>4</b>           | <b>60,363</b>  | <b>1.959E-06</b> | <b>0.419</b>  | <b>0.083</b> | <b>0.00060</b> | <b>144</b>   | <b>VT</b>   | <b>1,285</b> | <b>NA</b>     | <b>NA</b>      | <b>NA</b>    |

Potentially novel genes are shown in bold.

Abbreviations: Chr, Chromosome; MAF, minor allele frequency; cMAC, cumulative minor allele count; WBC, white blood cell; NEU, neutrophil; MON, monocytes; LYM, lymphocytes; SKAT, sequence kernel association test; VT, variable-threshold test; EA, European ancestry; AA, African ancestry; All, combined European, African, Hispanic American, East Asian and South Asian ancestries.

Table S11. Association between white blood cell trait associated variants and immunologically relevant quantitative traits in previous genome-wide association studies ( $P < 1.64E-04$ ).

| Trait (population) | dbSNPID                 | Chr | Pos         | Alt/Ref | Gene                 | Quantitative traits                       | Sample size | P <sup>a</sup> | PMID                                                                                                                                                                                         |
|--------------------|-------------------------|-----|-------------|---------|----------------------|-------------------------------------------|-------------|----------------|----------------------------------------------------------------------------------------------------------------------------------------------------------------------------------------------|
| WBC (EA)           | rs1260326               | 2   | 27,730,940  | C/T     | <i>GCKR</i>          | C-reactive protein                        | 70,410      | 3.80E-43       | 23263486, 21300955, 23505291, 22939635, 18439548                                                                                                                                             |
| WBC (EA)           | rs1260326               | 2   | 27,730,940  | C/T     | <i>GCKR</i>          | Plasma protein-C levels                   | 9,424       | 2.00E-17       | 20802025                                                                                                                                                                                     |
| WBC (EA)           | rs1260326               | 2   | 27,730,940  | C/T     | <i>GCKR</i>          | Serum urate                               | 50,337      | 5.90E-17       | 20884846, 23263486, 21768215, 19503597, 21943158                                                                                                                                             |
| WBC (EA)           | rs1260326               | 2   | 27,730,940  | C/T     | <i>GCKR</i>          | Platelet count                            | 37,438      | 9.10E-10       | 22139419                                                                                                                                                                                     |
| WBC (EA)           | rs1260326               | 2   | 27,730,940  | C/T     | <i>GCKR</i>          | 2-hour glucose tolerance test             | 133,010     | 9.00E-15       | 22885924, 20081857, 23263486                                                                                                                                                                 |
| WBC (EA)           | rs1260326               | 2   | 27,730,940  | C/T     | <i>GCKR</i>          | Fasting blood glucose                     | 133,010     | 2.20E-41       | 22885924, 20081857, 20081858, 23263486                                                                                                                                                       |
| WBC (EA)           | rs1260326               | 2   | 27,730,940  | C/T     | <i>GCKR</i>          | Fasting insulin                           | 133,010     | 2.70E-22       | 22885924, 20081857, 20081858, 23263486                                                                                                                                                       |
| WBC (EA)           | rs1260326               | 2   | 27,730,940  | C/T     | <i>GCKR</i>          | Factor VII activity in plasma             | 31,212      | 6.20E-24       | 21676895, 20231535, 21676895                                                                                                                                                                 |
| WBC (EA)           | rs1260326               | 2   | 27,730,940  | C/T     | <i>GCKR</i>          | Total cholesterol                         | 140,059     | 4.40E-28       | 20686565, 23063622, 20339536, 20339536, 19060906                                                                                                                                             |
| WBC (EA)           | rs1260326               | 2   | 27,730,940  | C/T     | <i>GCKR</i>          | Triglycerides                             | 140,059     | 1.30E-139      | 20686565, 22629316, 23063622, 19936222, 18193043, 20657596, 19060911, 19802338, 20339536, 23505323, 20139978, 19060910, 23236364, 21943158, 18454146, 19913121, 21862451, 19060906, 22171074 |
| WBC (EA)           | rs1260326               | 2   | 27,730,940  | C/T     | <i>GCKR</i>          | HDL                                       | 26,768      | 6.30E-36       | 19936222                                                                                                                                                                                     |
| WBC (EA)           | rs1260326               | 2   | 27,730,940  | C/T     | <i>GCKR</i>          | Height                                    | 183,727     | 9.40E-05       | 20881960                                                                                                                                                                                     |
| WBC (EA)           | rs1260326               | 2   | 27,730,940  | C/T     | <i>GCKR</i>          | HOMA-IR                                   | 122,744     | 9.20E-07       | 20081858, 20081857, 23263486                                                                                                                                                                 |
| WBC (All)          | rs185819                | 6   | 32,050,067  | C/T     | <i>TNXB</i>          | Height                                    | 183,727     | 1.70E-06       | 20881960, 18391951                                                                                                                                                                           |
| WBC (All)          | rs9374080               | 6   | 109,616,420 | C/T     | <i>CCDC162P</i>      | Mean corpuscular hemoglobin concentration | 135,367     | 3.00E-21       | 23222517                                                                                                                                                                                     |
| WBC (All)          | rs9374080               | 6   | 109,616,420 | C/T     | <i>CCDC162P</i>      | Mean corpuscular volume                   | 135,367     | 2.30E-18       | 23222517, 19862010, 20139978                                                                                                                                                                 |
| WBC (All)          | rs9374080               | 6   | 109,616,420 | C/T     | <i>CCDC162P</i>      | Red blood cell count                      | 135,367     | 1.60E-15       | 23222517                                                                                                                                                                                     |
| MON (All)          | rs4917014               | 7   | 50,305,863  | G/T     | <i>C7orf72-IKZF1</i> | HDL                                       | 140,059     | 2.40E-05       | 20686565                                                                                                                                                                                     |
| WBC (EA)           | rs1935                  | 10  | 64,927,823  | G/C     | <i>JMJD1C</i>        | Platelet count                            | 16,388      | 2.70E-08       | 22423221                                                                                                                                                                                     |
| WBC (EA)           | rs1935                  | 10  | 64,927,823  | G/C     | <i>JMJD1C</i>        | Triglycerides                             | 140,059     | 1.50E-07       | 20686565, 19060906                                                                                                                                                                           |
| MON (EA)           | rs11625112 <sup>b</sup> | 14  | 23,596,740  | G/A     | <i>SLC7A8</i>        | Triglycerides                             | 140,059     | 4.90E-05       | 20686565, 19060906                                                                                                                                                                           |
| WBC (All)          | rs2836878               | 21  | 40,465,534  | A/G     | <i>ETS2-PSMG1</i>    | C-reactive protein                        | 82,725      | 4.00E-08       | 21300955, 22939635                                                                                                                                                                           |

<sup>a</sup>Lookup of 16 single nucleotide variants was performed and results with multiple testing corrected p-value  $< 1.64E-04$  (16 variants and 19 quantitative traits) are shown here. When multiple studies report the same variant-trait associations, results from the largest sample size are presented here.

<sup>b</sup> LD  $r^2$  between rs11625112 and rs2239633 in *SLC7A8* is 0.63.

Abbreviations: Chr, chromosome; Pos, basepair position; Alt, effect allele; Ref, reference allele; HDL, high density lipoprotein; HOMA-IR, homeostatic model assessment-insulin resistance; WBC, white blood cell; NEU, neutrophil; MON, monocyte; LYM, lymphocyte; BAS, basophil.

Table S12. White blood cell trait variants associated with platelet and red blood cell related traits in the European and combined All ancestries of the Blood-Cell Consortium.

| dbSNPID                        | Chr | Pos         | Gene            | Alt/Ref | EAF  | Trait | Beta   | SE    | P        |
|--------------------------------|-----|-------------|-----------------|---------|------|-------|--------|-------|----------|
| <b>European ancestry</b>       |     |             |                 |         |      |       |        |       |          |
| rs1260326                      | 2   | 27,730,940  | <i>GCKR</i>     | C/T     | 0.58 | WBC   | -0.03  | 0.005 | 4.01E-10 |
|                                |     |             |                 |         |      | PLT   | -0.037 | 0.005 | 7.15E-14 |
|                                |     |             |                 |         |      | RBC   | 0.022  | 0.006 | 5.73E-04 |
|                                |     |             |                 |         |      | HCT   | 0.023  | 0.005 | 7.53E-06 |
|                                |     |             |                 |         |      | HGB   | 0.022  | 0.005 | 3.74E-06 |
| rs2229094                      | 6   | 31,540,556  | <i>LTA</i>      | C/T     | 0.26 | LYM   | 0.046  | 0.008 | 1.89E-08 |
|                                |     |             |                 |         |      | PLT   | 0.019  | 0.006 | 2.04E-03 |
| rs1935                         | 10  | 64,927,823  | <i>JMJD1C</i>   | G/C     | 0.49 | WBC   | -0.026 | 0.005 | 2.46E-08 |
|                                |     |             |                 |         |      | PLT   | 0.05   | 0.005 | 3.11E-25 |
|                                |     |             |                 |         |      | MPV   | -0.112 | 0.008 | 7.64E-41 |
|                                |     |             |                 |         |      | RDW   | -0.017 | 0.007 | 1.75E-02 |
|                                |     |             |                 |         |      | MCH   | 0.017  | 0.007 | 1.18E-02 |
| rs4763879                      | 12  | 9,910,164   | <i>CD69</i>     | A/G     | 0.36 | LYM   | -0.038 | 0.007 | 3.08E-08 |
|                                |     |             |                 |         |      | HGB   | -0.01  | 0.005 | 3.44E-02 |
|                                |     |             |                 |         |      | MCHC  | -0.012 | 0.006 | 3.38E-02 |
| rs11625112                     | 14  | 23,596,740  | <i>SLC7A8</i>   | G/A     | 0.46 | MON   | -0.038 | 0.007 | 3.82E-08 |
|                                |     |             |                 |         |      | HCT   | 0.012  | 0.005 | 1.76E-02 |
| rs1292053                      | 17  | 57,963,537  | <i>TUBD1</i>    | G/A     | 0.45 | WBC   | -0.03  | 0.004 | 1.28E-11 |
|                                |     |             |                 |         |      | PLT   | -0.017 | 0.005 | 1.94E-04 |
|                                |     |             |                 |         |      | RDW   | 0.024  | 0.007 | 3.85E-04 |
|                                |     |             |                 |         |      | HCT   | -0.015 | 0.005 | 2.05E-03 |
|                                |     |             |                 |         |      | HGB   | -0.016 | 0.005 | 5.11E-04 |
|                                |     |             |                 |         |      | MCV   | -0.012 | 0.006 | 4.34E-02 |
| rs3865444                      | 19  | 51,727,962  | <i>CD33</i>     | A/C     | 0.31 | WBC   | -0.037 | 0.005 | 3.51E-12 |
|                                |     |             |                 |         |      | PLT   | -0.026 | 0.005 | 1.11E-06 |
|                                |     |             |                 |         |      | MCHC  | 0.016  | 0.006 | 8.70E-03 |
| rs2295764                      | 20  | 31,025,163  | <i>ASXL1</i>    | G/A     | 0.36 | BAS   | -0.042 | 0.007 | 3.28E-09 |
|                                |     |             |                 |         |      | RDW   | 0.034  | 0.007 | 2.35E-06 |
| <b>All combined ancestries</b> |     |             |                 |         |      |       |        |       |          |
| rs2276853                      | 3   | 47,282,303  | <i>KIF9</i>     | A/G     | 0.58 | WBC   | 0.023  | 0.004 | 3.65E-08 |
|                                |     |             |                 |         |      | HGB   | -0.011 | 0.004 | 1.14E-02 |
| rs9374080                      | 6   | 109,616,420 | <i>CCDC162P</i> | C/T     | 0.43 | WBC   | 0.023  | 0.004 | 4.01E-08 |
|                                |     |             |                 |         |      | PLT   | 0.015  | 0.004 | 3.07E-04 |
|                                |     |             |                 |         |      | MPV   | -0.024 | 0.007 | 9.28E-04 |
|                                |     |             |                 |         |      | RBC   | -0.043 | 0.005 | 3.13E-15 |
|                                |     |             |                 |         |      | RDW   | -0.041 | 0.006 | 6.19E-11 |

|           |    |            |                   |     |      |      |        |       |          |
|-----------|----|------------|-------------------|-----|------|------|--------|-------|----------|
|           |    |            |                   |     |      | MCV  | 0.06   | 0.006 | 8.84E-28 |
|           |    |            |                   |     |      | MCH  | 0.062  | 0.006 | 3.10E-26 |
|           |    |            |                   |     |      | MCHC | 0.023  | 0.005 | 5.13E-06 |
| rs185819  | 6  | 32,050,067 | <i>TNXB</i>       | C/T | 0.51 | WBC  | 0.031  | 0.005 | 4.02E-10 |
|           |    |            |                   |     |      | PLT  | 0.017  | 0.005 | 6.16E-04 |
|           |    |            |                   |     |      | MPV  | -0.023 | 0.009 | 8.78E-03 |
|           |    |            |                   |     |      | MCH  | -0.015 | 0.007 | 2.94E-02 |
| rs1292053 | 17 | 57,963,537 | <i>TUBD1</i>      | G/A | 0.45 | MON  | -0.036 | 0.006 | 2.55E-09 |
|           |    |            |                   |     |      | PLT  | -0.013 | 0.004 | 1.40E-03 |
|           |    |            |                   |     |      | RBC  | -0.012 | 0.005 | 2.51E-02 |
|           |    |            |                   |     |      | RDW  | 0.023  | 0.006 | 2.30E-04 |
|           |    |            |                   |     |      | HCT  | -0.013 | 0.004 | 2.97E-03 |
|           |    |            |                   |     |      | HGB  | -0.013 | 0.004 | 1.02E-03 |
| rs2836878 | 21 | 40,465,534 | <i>ETS2-PSMG1</i> | A/G | 0.26 | WBC  | -0.025 | 0.005 | 8.36E-08 |
|           |    |            |                   |     |      | PLT  | -0.014 | 0.005 | 3.44E-03 |
|           |    |            |                   |     |      | RDW  | -0.025 | 0.007 | 3.28E-04 |
|           |    |            |                   |     |      | HCT  | 0.016  | 0.005 | 1.37E-03 |
|           |    |            |                   |     |      | HGB  | 0.022  | 0.005 | 2.72E-06 |
|           |    |            |                   |     |      | MCV  | 0.014  | 0.006 | 2.14E-02 |
|           |    |            |                   |     |      | MCH  | 0.024  | 0.007 | 2.78E-04 |
|           |    |            |                   |     |      | MCHC | 0.019  | 0.006 | 9.14E-04 |

Abbreviations: Chr, chromosome; Pos, basepair position; Alt, effect allele; Ref, reference allele; EAF, effect allele frequency; EA, European ancestry, All, combined European, African, Hispanic American, East Asian and South Asian ancestries; BAS, basophil; HCT, hematocrit; HGB, hemoglobin; LYM, lymphocyte; MCH, mean corpuscular hemoglobin; MCHC, mean corpuscular hemoglobin concentration; MCV, mean corpuscular volume; MON, monocytes; MPV, mean platelet volume; PLT, platelet; RBC, red blood cell; RDW, red cell distribution width; WBC, white blood cell.

See Table S13 in the accompanying Excel file.

## **Additional Funding Information**

### **Airwave**

The Airwave Study is funded by the Home Office (grant number 780-TETRA) with additional support from the National Institute for Health Research (NIHR) Imperial College Healthcare NHS Trust (ICHNT) and Imperial College Biomedical Research Centre (BRC) (Grant number BRC-P38084). Paul Elliott is an NIHR Senior Investigator and is supported by the ICHNT and Imperial College BRC, the MRC-PHE Centre for Environment and Health and the NIHR Health Protection Research Unit on Health Impact of Environmental Hazards.

### **ARIC**

The Atherosclerosis Risk in Communities (ARIC) Study is carried out as a collaborative study supported by National Heart, Lung, and Blood Institute (NHLBI) contracts (HHSN268201100005C, HHSN268201100006C, HHSN268201100007C, HHSN268201100008C, HHSN268201100009C, HHSN268201100010C, HHSN268201100011C, and HHSN268201100012C), R01HL087641, R01HL59367 and R01HL086694; National Human Genome Research Institute contract U01HG004402; and National Institutes of Health contract HHSN268200625226C.

### **BioMe**

The Mount Sinai Institute for Personalized Medicine Biobank Program is supported by The Andrea and Charles Bronfman Philanthropies.

### **BIOVU**

The dataset used in the analyses described were obtained from Vanderbilt University Medical Center's BioVU which is supported by institutional funding and by the Vanderbilt CTSA grant UL1 TR000445 from NCATS (National Center for Advancing Translational Sciences)/National Institutes of Health (NIH). Genome-wide genotyping was funded by NIH grants RC2GM092618 from NIGMS/OD and U01HG004603 from the National

Human Genome Research Institute (NHGRI)/ National Institute of General Medical Sciences (NIGMS). Funding for TLE and DRVE was provided by 1R21HL12142902 from NHLBI/NIH. Funding for the BioVU replication cohort was provided by 5R01HD074711 from National Institute of Child Health and Human Development (NICHD)/NIH. PheWAS studies were supported by R01LM010685 from the National Library of Medicine.

## **CARDIA**

The CARDIA Study is conducted and supported by the NHLBI in collaboration with the University of Alabama at Birmingham (HHSN268201300025C & HHSN268201300026C), Northwestern University (HHSN268201300027C), University of Minnesota (HHSN268201300028C), Kaiser Foundation Research Institute (HHSN268201300029C), and Johns Hopkins University School of Medicine (HHSN268200900041C). CARDIA is also partially supported by the Intramural Research Program of the National Institute on Aging (NIA). Exomechip genotyping was supported from grants R01-HL093029 and U01- HG004729 to MF. This manuscript has been reviewed and approved by CARDIA for scientific content.

## **CHS**

This CHS research was supported by NHLBI contracts HHSN268201200036C, HHSN268200800007C, N01HC55222, N01HC85079, N01HC85080, N01HC85081, N01HC85082, N01HC85083, N01HC85086; and NHLBI grants HL080295, HL087652, HL103612, HL105756, HL120393, R01HL068986 with additional contribution from the National Institute of Neurological Disorders and Stroke (NINDS). Additional support was provided through AG023629 from the NIA. A full list of CHS investigators and institutions can be found at <http://chs-nhlbi.org/>. The provision of genotyping data was supported in part by the National Center for Advancing Translational Sciences, CTSI grant UL1TR000124, and the National Institute of Diabetes and Digestive and Kidney Disease Diabetes Research Center (DRC) grant DK063491 to the Southern California Diabetes Endocrinology Research Center.

## **EGCUT**

This study was supported by EU H2020 grants 692145, 676550, 654248, Estonian Research Council Grant IUT20-60, NIASC, EIT – Health and NIH-BMI grant 2R01DK075787-06A1.

## **FINCAVAS**

This work was supported by the Competitive Research Funding of the Tampere University Hospital (Grant 9M048 and 9N035), the Finnish Cultural Foundation, the Finnish Foundation for Cardiovascular Research, the Emil Aaltonen Foundation, Finland, and the Tampere Tuberculosis Foundation.

## **FramHS**

Genotyping, quality control and calling of the Illumina HumanExome BeadChip in the Framingham Heart Study was supported by funding from the National Heart, Lung and Blood Institute Division of Intramural Research (Daniel Levy and Christopher J. O’Donnell, Principle Investigators). Support for the centralized genotype calling was provided by Building on GWAS for NHLBI-diseases: the U.S. CHARGE consortium through the NIH American Recovery and Reinvestment Act of 2009 (5RC2HL102419). The NHLBI’s Framingham Heart Study is a joint project of the National Institutes of Health and Boston University School of Medicine and was supported by contract N01-HC-25195.

## **GeneSTAR**

GeneSTAR was supported by the NIH/NHLBI (U01 HL72518, HL087698, and HL112064) and by a grant from the NIH/National Center for Research Resources (M01-RR000052) to the Johns Hopkins General Clinical Research Center. Genotyping services were provided through the RS&G Service by the Northwest Genomics Center at the University of Washington, Department of Genome Sciences, under U.S. Federal Government contract number HHSN268201100037C from the National Heart, Lung, and Blood Institute.

## **HABC**



HABC funding/acknowledgement: The Health ABC Study was supported by NIA contracts N01AG62101, N01AG62103, and N01AG62106 and, in part, by the NIA Intramural Research Program. The genome-wide association study was funded by NIA grant 1R01AG032098-01A1 to Wake Forest University Health Sciences and genotyping services were provided by the Center for Inherited Disease Research (CIDR). CIDR is fully funded through a federal contract from the National Institutes of Health to The Johns Hopkins University, contract number HHSN268200782096C. This study utilized the high-performance computational capabilities of the Biowulf Linux cluster at the National Institutes of Health, Bethesda, Md. (<http://biowulf.nih.gov>).

## **HANDLS**

The Healthy Aging in Neighborhoods of Diversity across the Life Span Study (HANDLS) research was supported by the Intramural Research Program of the NIH, NIA and the National Center on Minority Health and Health Disparities (project # Z01-AG000513 and human subjects protocol # 2009-149). Data analyses for the HANDLS study utilized the computational resources of the NIH HPC Biowulf cluster at the National Institutes of Health, Bethesda, MD (<http://hpc.nih.gov>).

## **JHS**

We thank the Jackson Heart Study (JHS) participants and staff for their contributions to this work. The JHS is supported by contracts HHSN268201300046C, HHSN268201300047C, HHSN268201300048C, HHSN268201300049C, HHSN268201300050C from the National Heart, Lung, and Blood Institute and the National Institute on Minority Health and Health Disparities.

## **LBC1921 and LBC1936**

Phenotype collection in the Lothian Birth Cohort 1921 was supported by the UK's Biotechnology and Biological Sciences Research Council (BBSRC), The Royal Society and The Chief Scientist Office of the Scottish Government. Phenotype collection in the Lothian Birth Cohort 1936 was supported by Age UK (The Disconnected Mind project). Genotyping was supported by Centre for Cognitive Ageing and Cognitive

Epidemiology (Pilot Fund award), Age UK, and the Royal Society of Edinburgh. The work was undertaken by The University of Edinburgh Centre for Cognitive Ageing and Cognitive Epidemiology, part of the cross council Lifelong Health and Wellbeing Initiative (MR/K026992/1). Funding from the BBSRC and Medical Research Council (MRC) is gratefully acknowledged. WDH is supported by a grant from Age UK (Disconnected Mind Project).

## **MESA**

MESA and the MESA SHARe project are conducted and supported by the NHLBI in collaboration with MESA investigators. Support for MESA is provided by contracts HHSN268201500003I, N01-HC-95159, N01-HC-95160, N01-HC-95161, N01-HC-95162, N01-HC-95163, N01-HC-95164, N01-HC-95165, N01-HC-95166, N01-HC-95167, N01-HC-95168, N01-HC-95169, UL1-TR-001079, UL1-TR-000040, and DK063491. MESA Family is conducted and supported by the NHLBI in collaboration with MESA investigators. Support is provided by grants and contracts R01HL071051, R01HL071205, R01HL071250, R01HL071251, R01HL071258, R01HL071259, by the National Center for Research Resources, Grant UL1RR033176, and the NCATS, Grant UL1TR000124. Funding support for the inflammation dataset was provided by grant HL077449. The MESA Epigenomics & Transcriptomics Study was funded by NIA grant 1R01HL101250-01 to Wake Forest University Health Sciences.

## **MHIBB**

This work was supported by the Fonds de Recherche du Québec–Santé (FRQS, scholarship to NC), the Canadian Institute of Health Research (Banting-CIHR, scholarship to SL and operating grant MOP#123382 to GL), the Canada Research Chair program (to GL, JDR, and JCT), and the Montreal Heart Institute (MHI) Foundation. JCT holds the Canada Research Chair in translational and personalized medicine and the Université de Montréal endowed research chair in atherosclerosis.

## **REGARDS**

The genotyping for this project was provided by NIH/National Center for Research Resources (NCRR) grant 5U54RR026137-03.

## **RS**

The generation and management of the Illumina Exomechip v1.0 array data for the Rotterdam Study (RS-I) was executed by the Human Genotyping Facility of the Genetic Laboratory of the Department of Internal Medicine, Erasmus MC, Rotterdam, The Netherlands. The Exomechip array data set was funded by the Genetic Laboratory of the Department of Internal Medicine, Erasmus MC, from the Netherlands Genomics Initiative (NGI)/Netherlands Organisation for Scientific Research (NWO)-sponsored Netherlands Consortium for Healthy Aging (NCHA; project nr. 050-060-810); the Netherlands Organization for Scientific Research (NWO; project number 184021007) and by the Rainbow Project (RP10; Netherlands Exomechip Project) of the Biobanking and Biomolecular Research Infrastructure Netherlands (BBMRI-NL; [www.bbmri.nl](http://www.bbmri.nl)). The Rotterdam Study is funded by Erasmus Medical Center and Erasmus University, Rotterdam, Netherlands Organization for the Health Research and Development (ZonMw), the Research Institute for Diseases in the Elderly (RIDE), the Ministry of Education, Culture and Science, the Ministry for Health, Welfare and Sports, the European Commission (DG XII), and the Municipality of Rotterdam.

## **SHIP and SHIP-Trend**

SHIP is part of the Community Medicine Research net of the University of Greifswald, Germany, which is funded by the Federal Ministry of Education and Research (grants no. 01ZZ9603, 01ZZ0103, and 01ZZ0403), the Ministry of Cultural Affairs as well as the Social Ministry of the Federal State of Mecklenburg-West Pomerania, and the network 'Greifswald Approach to Individualized Medicine (GANI\_MED)' funded by the Federal Ministry of Education and Research (grant 03IS2061A). ExomeChip data have been supported by the Federal Ministry of Education and Research (grant no. 03Z1CN22) and the Federal State of Mecklenburg-West Pomerania. The University of Greifswald is a member of the 'Center of Knowledge Interchange' program of the Siemens AG and the Caché Campus program of the InterSystems GmbH. The SHIP and SHIP-TREND samples were genotyped at the Helmholtz Zentrum München.

## **STABILITY and SOLID TIMI-52**

The STABILITY and SOLID TIMI-52 studies were funded by GlaxoSmithKline. Michelle L. O'Donoghue reports receiving grants from GlaxoSmithKline, Merck, AstraZeneca, and Eisai.

## **WHI**

The WHI program is funded by the NHLBI, NIH, and the US Department of Health and Human Services (HHSN268201100046C, HHSN268201100001C, HHSN268201100002C, HHSN268201100003C, HHSN268201100004C and HHSN271201100004C). Exomechip data and analysis were supported through the Exome Sequencing Project (NHLBI RC2 HL-102924, RC2 HL-102925 and RC2 HL-102926), the Genetics and Epidemiology of Colorectal Cancer Consortium (National Cancer Institute CA137088), and the Genomics and Randomized Trials Network (NHGRI U01-HG005152). A full listing of WHI investigators can be found at: <http://www.whi.org/researchers/Documents%20%20Write%20a%20Paper/WHI%20Investigator%20Short%20List.pdf>

## **Supplemental Acknowledgments**

The MHI Biobank thanks all participants and staff of the MHI Biobank and acknowledges the technical support of the Beaulieu-Saucier MHI Pharmacogenomic Center. The WHI study thanks investigators and staff for their dedication in making the program possible. The FHS authors are pleased to acknowledge the Shared Computing Cluster, which is administered by Boston University's Research Computing Services. URL: [www.bu.edu/tech/support/research/](http://www.bu.edu/tech/support/research/). The views expressed in this manuscript are those of the authors and do not necessarily represent the views of the National Heart, Lung, and Blood Institute; the National Institutes of Health; or the U.S. Department of Health and Human Services. ARIC thanks the staff and participants of the ARIC study for their important contributions. Infrastructure was partly supported by Grant Number UL1RR025005, a component of the National Institutes of Health and NIH Roadmap for Medical Research. The meta-analysis and meta-regression analyses were funded by grant R01 HL086694 from the National Heart, Lung, and Blood Institute. Airwave study thanks all participants in the Airwave Health Monitoring Study;

Louisa Cavaliero who assisted in data collection and management as well as Peter McFarlane and the Glasgow CARE, Patricia Munroe at Queen Mary University of London, Joanna Sarnecka and Ania Zawodniak at Northwick Park for their contributions to the study. GeneSTAR thanks all of our participating families. MESA thanks its Coordinating Center, MESA investigators, and study staff for their valuable contributions. A full list of participating MESA investigators and institutions can be found at <http://www.mesa-nhlbi.org>. A full list of CHS investigators and institutions can be found at <http://chs-nhlbi.org/>. SOLID-TIMI-52 and STABILITY thank Liling Warren for contributions to the genetic analysis of the study datasets. The University of Greifswald is a member of the 'Center of Knowledge Interchange' program of the Siemens AG and the Caché Campus program of the InterSystems GmbH. The SHIP and SHIP-TREND samples were genotyped at the Helmholtz Zentrum München, Germany. EGCUT thanks all the participants and co-workers at Estonian Biobank, especially Mr. V. Soo, Mr. S. Smith and Dr. L. Milani. FINCAVAS thanks the staff at the Department of Clinical Physiology for data collection. LBC thanks the cohort participants and team members who contributed to these studies. RS thanks Ms. Mila Jhamai, Ms. Sarah Higgins, and Mr. Marijn Verkerk for their help in creating the exomechip database, and Carolina Medina-Gomez, MSc, Lennard Karsten, MSc, and Linda Broer Ph.D. for quality control and variant. RS is also grateful to the study participants, the staff from the Rotterdam Study and the participating general practitioners and pharmacists. REGARDS thanks the investigators, staff and participants of the study for their valuable contributions. A full list of participating REGARDS investigators and institutions can be found at <http://www.regardsstudy.org>.
